# Supplementary material for: Non-identical electronic characters of the internucleotidic phosphates in RNA modulate the chemical reactivity of the phosphodiester bonds
Source: Royal Society of Chemistry journal article supplement (doi:10.1039/b516733g), 2006-01-01
Supplement: b516733g_5.pdf [file b516733g_5.pdf]

## Electronic Supplementary Information 5

### Non-identical Electronic Characters of the Internucleotidic Phosphates in RNA Modulate the Chemical Reactivity of the Phosphodiester Bonds

Jharna Barman<sup>1</sup>, Sandipta Acharya<sup>1</sup>, Chuanzheng Zhou<sup>1</sup>, Subhrangsu Chatterjee<sup>1</sup>, Åke Engström<sup>2</sup>, and Jyoti Chattopadhyaya<sup>1\*</sup>

<sup>1</sup>Department of Bioorganic Chemistry, Box 581, Biomedical Center, Uppsala University, S-751 23 Uppsala, Sweden

<sup>2</sup>Department of Medical Biochemistry and Microbiology, Box 582, Biomedical Center, Uppsala University, S-751 23 Uppsala, Sweden

[jyoti@boc.uu.se](mailto:jyoti@boc.uu.se)

#### Table of Content:

**Figure S14.** An example of the calculation considering the extinction co-efficients for heptamer**7b**. [p. S2](#)

**Table S9:** Tables (A) – (G) show Maldi ToF negative ion mode mass analysis of the nucleotide fragments from the peaks separated by RP-Hplc and SMART™ RP-Hplc after 1h alkali digestion of the heptameric ssRNAs. [p. S3 – S9](#)

**Figure S15A.** Panels (a1) – (a8) show the RP-Hplc and SMART™ RP-Hplc profiles at ½, 2, 3, 4, 8, 15, 27, 48 h of alkali digestion of native heptamer **5'-r(CAAGAAC)-3'** (**5b**). [p. S10 – S17](#)

**Figure S14:** An example of the calculation considering the extinction co-efficients for heptamer7b

The picture below shows the percentage cleavage of all products separated by both RP-Hplc and SMART™ RP-Hplc analysis and subsequent identification of the components by Maldi ToF mass spectral analysis for the heptamer 7b (after 1 h alkaline degradation at 20°C).

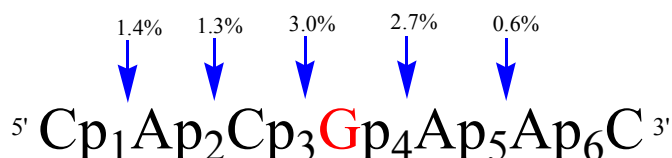

Now, the molar extinction coefficient,  $\epsilon$ , for the heptamer 7b is  $68.5 \times 10^3$  L/(mole·cm).

(1) Molar extinction coefficient,  $\epsilon$ , for 5'-ACGAAC-3' is  $62.9 \times 10^3$  L/(mole·cm). Therefore the value 1.4% is corrected by the multiplication factor of  $\epsilon_{(7mer)}/\epsilon_{(6mer)} = 1.089$ . The corrected value for the % cleavage at Cp<sub>1</sub>A is 1.5% instead of 1.4%.

(2) Molar extinction coefficient,  $\epsilon$ , for 5'-CGAAC-3' is  $49.1 \times 10^3$  L/(mole·cm). Therefore the value 1.3% is corrected by the multiplication factor of  $\epsilon_{(7mer)}/\epsilon_{(5mer)} = 1.395$ . The corrected value for the % cleavage at Ap<sub>2</sub>C is 1.8% instead of 1.3%.

(3) Molar extinction coefficient,  $\epsilon$ , for 5'-GAAC-3' is  $42.8 \times 10^3$  L/(mole·cm). Therefore the value 3.0% is corrected by the multiplication factor of  $\epsilon_{(7mer)}/\epsilon_{(4mer)} = 1.600$ . The corrected value for the % cleavage at Cp<sub>3</sub>G is 4.8% instead of 3.0%.

(4) Molar extinction coefficient,  $\epsilon$ , for 5'-CACG<sub>(2/3'-P)/2', 3'-cMP</sub> is  $37.2 \times 10^3$  L/(mole·cm). Therefore the value 2.7% is corrected by the multiplication factor of  $\epsilon_{(7mer)}/\epsilon_{(5mer)} = 1.841$ . The corrected value for the % cleavage at Gp<sub>4</sub>A is 5.0% instead of 2.7%.

(5) Molar extinction coefficient,  $\epsilon$ , for 5'-CACGA<sub>(2/3'-P)/2', 3'-cMP</sub> is  $50.9 \times 10^3$  L/(mole·cm). Therefore the value 0.6% is corrected by the multiplication factor of  $\epsilon_{(7mer)}/\epsilon_{(5mer)} = 1.346$ . The corrected value for the % cleavage at Ap<sub>5</sub>A is 0.8% instead of 0.6%.

Hence the final percentage cleavage for the heptamer 7b is as follows, which is used in Figure 4 in the text:

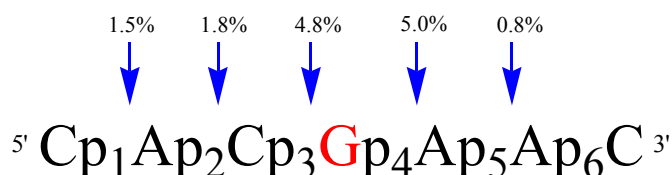

**Table S9(A):****RNA Sequence: 5'-r(CAAGAAC)-3'**

Maldi ToF (Negative ion mode) mass analysis of the degradation products (separated by RP-Hplc analysis) after 1h alkali digestion [Condition: pH 12.5 (0.03N aqueous NaOH) / 20°C, followed by neutralization at pH 7 (see experimentals) ]. For Hplc separation profile, see Fig S12(a2), Fig S12(a2i)-(a2j). For mass spectrum, see Fig S13(a1)-(a8).

| RP-Hplc Retention Time (R <sub>T</sub> in min)# | SMART™ RP-Hplc Retention Time (R <sub>T</sub> in min)* | Mass (m/z) |          | Nucleotide fragment (5'→3')      |
|-------------------------------------------------|--------------------------------------------------------|------------|----------|----------------------------------|
|                                                 |                                                        | Observed   | Expected |                                  |
| 21.52                                           |                                                        | 962.2      | 963.2    | HO-CAA <sub>2/3</sub> -P-OH      |
| 23.86                                           | 34.74<br>34.07                                         | 1245.3     | 1246.2   | HO-GAAC-OH                       |
|                                                 |                                                        | 1307.3     | 1308.2   | HO-CAAG <sub>(2', 3'-cMP)</sub>  |
| 25.44                                           | 27.93<br>27.12                                         | 1574.4     | 1575.3   | HO-AGAAC-OH                      |
|                                                 |                                                        | 1636.3     | 1637.3   | HO-CAAGA <sub>(2', 3'-cMP)</sub> |
| 26.21 <sup>‡</sup>                              |                                                        | 900.2      | 901.2    | HO-AAC-OH                        |
|                                                 |                                                        | 2208.3     | 2209.4   | Heptamer                         |
| 27.10                                           |                                                        | 1903.3     | 1904.3   | HO-AAGAAC-OH                     |

# RP-Hplc retention times shown represent the first round of Hplc separation, which although showed single peak at times but they were in fact a mixture of constituent oligonucleotides as a result of co-elution as evident by Maldi ToF mass spectrometry.

\*SMART™ RP-Hplc retention times shown represent the separation of the constituent oligonucleotides which did not separate by the first round of RP-Hplc separation.

<sup>‡</sup>Smaller molecular weight species was found to form from the larger molecular weight species, which was proven by the fact that when the strength of the laser energy was reduced in the Maldi ToF spectrometry, the daughter ion disappeared.

**Table S9(B):****RNA Sequence: 5'-r(CAAGCAC)-3'**

Maldi Tof (Negative ion mode) mass analysis of the degradation products (separated by Hplc analysis) after 1h alkali digestion [Condition: pH 12.5 (0.03N aqueous NaOH) / 20°C, followed by neutralization at pH 7 (see experimentals) ]. For Hplc separation profile, see Fig S12(b2) and Fig S12(b2i)-(b2j). For Mass spectrum, see Fig S13(b1)-(b10).

| RP-Hplc Retention Time (R <sub>T</sub> in min)# | SMART™ RP-Hplc Retention Time (R <sub>T</sub> in min)* | Mass (m/z)       |                  | Nucleotide fragment (5'→3')                                       |
|-------------------------------------------------|--------------------------------------------------------|------------------|------------------|-------------------------------------------------------------------|
|                                                 |                                                        | Observed         | Expected         |                                                                   |
| 19.87                                           |                                                        | 876.1            | 877.2            | HO-CAC-OH                                                         |
| 21.04                                           | 22.16<br>20.68                                         | 980.1<br>1221.3  | 981.2<br>1222.2  | OH-CAA <sub>2/3</sub> -P-OH<br>OH-GCAC-OH                         |
| 21.77                                           |                                                        | 962.1            | 963.2            | HO-CAA <sub>(2',3'-cMP)</sub>                                     |
| 22.76                                           |                                                        | 1325.3           | 1326.2           | HO-CAAG <sub>2/3</sub> -P-OH                                      |
| 24.05                                           | 29.33<br>30.12                                         | 1307.3<br>1612.4 | 1308.2<br>1613.2 | HO-CAAG <sub>(2',3'-cMP)</sub><br>HO-CAAGC <sub>(2',3'-cMP)</sub> |
| 25.27                                           |                                                        | 2184.7           | 2185.4           | Heptamer                                                          |
| ~25.50                                          |                                                        | 1550.4<br>2184.6 | 1551.3<br>2185.4 | OH-AGCAC-OH<br>Heptamer                                           |
| 27.31                                           |                                                        | 1879.5           | 1880.3           | HO-AAGCAC-OH                                                      |

# RP-Hplc retention times shown represent the first round of Hplc separation, which although showed single peak at times but they were in fact a mixture of constituent oligonucleotides as a result of co-elution as evident by Maldi Tof mass spectrometry.

\*SMART™ RP-Hplc retention times shown represent the separation of the constituent oligonucleotides which did not separate by the first round of RP-Hplc separation.

**Table S9(C):****RNA Sequence: 5'-r(CACGAAC)-3'**

Maldi ToF (Negative ion mode) mass analysis of the degradation products (separated by Hplc analysis) after 1h alkali digestion [Condition: pH 12.5 (0.03N aqueous NaOH) / 20°C, followed by neutralization at pH 7 (see experimentals) ]. For Hplc separation profile, see Fig S12(c2) and Fig S13(c2i)-(c2j). For Mass spectrum, see Fig S13(c1)-(c8).

| RP-Hplc Retention Time (R <sub>T</sub> in min)# | SMART™ RP-Hplc Retention Time (R <sub>T</sub> in min)* | Mass (m/z)       |                  | Nucleotide fragment (5'→3')                      |
|-------------------------------------------------|--------------------------------------------------------|------------------|------------------|--------------------------------------------------|
|                                                 |                                                        | Observed         | Expected         |                                                  |
| 23.18                                           |                                                        | 1550.2           | 1551.3           | HO-CGAAC-OH                                      |
| 24.97                                           | 31.48<br>30.27                                         | 1245.1<br>1283.1 | 1246.2<br>1284.2 | HO-GAAC-OH<br>HO-CACG <sub>(2', 3'-cMP)</sub>    |
| 26.50                                           | 31.49<br>30.97                                         | 1879.2<br>1612.2 | 1880.3<br>1613.2 | HO-ACGAAC-OH<br>HO-CACGA <sub>(2', 3'-cMP)</sub> |
| 27.36 <sup>‡</sup>                              |                                                        | 900.0<br>2184.2  | 901.2<br>2185.4  | HO-AAC-OH<br>Heptamer                            |
| 28.06                                           |                                                        | 1879.1           | 1880.3           | HO-ACGAAC-OH                                     |

# RP-Hplc retention times shown represent the first round of Hplc separation, which although showed single peak at times but they were in fact a mixture of constituent oligonucleotides as a result of co-elution as evident by Maldi ToF mass spectrometry.

\*SMART™ RP-Hplc retention times shown represent the separation of the constituent oligonucleotides which did not separate by the first round of RP-Hplc separation.

<sup>‡</sup>Smaller molecular weight species was found to form from the larger molecular weight species, which was proven by the fact that when the strength of the laser energy was reduced in the Maldi ToF spectrometry, the daughter ion disappeared.

**Table S9 (D):****RNA Sequence: 5'-r(CACGCAC)-3'**

Maldi ToF (Negative ion mode) mass analysis of the degradation products (separated by Hplc analysis) after 1h alkali digestion [Condition: pH 12.5 (0.03N aqueous NaOH) / 20°C, followed by neutralization at pH 7 (see experimentals) ]. For Hplc separation profile, see Fig S12(d2) and Fig S13(d2i)-(d2l). For Mass spectrum, see Fig S13(d1)-(d12).

| RP-Hplc Retention Time (R <sub>T</sub> in min)# | SMART <sup>TM</sup> RP-Hplc Retention Time (R <sub>T</sub> in min)* | Mass (m/z) |          | Nucleotide fragment (5'→3')                                                   |
|-------------------------------------------------|---------------------------------------------------------------------|------------|----------|-------------------------------------------------------------------------------|
|                                                 |                                                                     | Observed   | Expected |                                                                               |
| 19.98                                           | 18.10                                                               | 876.2      | 877.2    | HO-CAC-OH<br>OH-CAC <sub>(2',3'-cM.P)</sub>                                   |
|                                                 | 18.55                                                               | 938.0      | 939.1    |                                                                               |
| 21.23                                           | 20.58                                                               | 1221.2     | 1222.2   | OH-GCAC-OH<br>OH-CGCAC-OH                                                     |
|                                                 | 21.15                                                               | 1526.1     | 1527.3   |                                                                               |
| 24.14                                           | 21.79                                                               | 1283.2     | 1284.2   | HO-CACG <sub>(2',3'-cMP)</sub><br>HO-CACGC <sub>(2',3'-cMP)</sub><br>Heptamer |
|                                                 | 23.04                                                               | 1588.2     | 1589.2   |                                                                               |
|                                                 | 26.20                                                               | 2160.2     | 2161.4   |                                                                               |
| 25.39                                           | 14.11                                                               | 1855.1     | 1856.3   | HO-ACGCAC-OH<br>Heptamer                                                      |
|                                                 | 14.75                                                               | 2160.1     | 2161.4   |                                                                               |

# RP-Hplc retention times shown represent the first round of Hplc separation, which although showed single peak at times but they were in fact a mixture of constituent oligonucleotides as a result of co-elution as evident by Maldi ToF mass spectrometry.

\*SMART<sup>TM</sup> RP-Hplc retention times shown represent the separation of the constituent oligonucleotides which did not separate by the first round of RP-Hplc separation.

**Table S9(E):****RNA Sequence: 5'-r(CAAG<sup>Me</sup>AAC)-3'**

Maldi ToF (Negative ion mode) mass analysis of the degradation products (separated by RP-Hplc analysis) after 1h alkali digestion [Condition: pH 12.5 (0.03N aqueous NaOH) / 20°C, followed by neutralization at pH 7 (see experimentals) ]. For Hplc separation profile, see Fig S12(e2), Fig S12(e2i)-(e2j). For mass spectrum, see Fig S12(e1)-(e11).

| RP-Hplc Retention Time (R <sub>T</sub> in min)# | SMART <sup>TM</sup> RP-Hplc Retention Time (R <sub>T</sub> in min)* | Mass (m/z)       |                  | Nucleotide fragment (5'→3')                                                                 |
|-------------------------------------------------|---------------------------------------------------------------------|------------------|------------------|---------------------------------------------------------------------------------------------|
|                                                 |                                                                     | Observed         | Expected         |                                                                                             |
| 20.39, 20.47                                    |                                                                     | 980.1            | 981.2            | HO-CAA <sub>2/3</sub> -P-OH                                                                 |
| 21.36                                           |                                                                     | 962.1            | 963.1            | HO-CAA <sub>2', 3'</sub> -cMP                                                               |
| 22.89                                           |                                                                     | 1339.2           | 1340.2           | HO-CAAG <sup>Me</sup> <sub>2/3</sub> -P-OH                                                  |
| 23.37                                           |                                                                     | 1321.2           | 1322.2           | HO-CAAG <sup>Me</sup> <sub>2', 3'</sub> -cMP                                                |
| 25.50                                           | 29.41<br>30.08                                                      | 1668.2<br>1997.2 | 1669.3<br>1998.3 | HO-CAAG <sup>Me</sup> <sub>A2/3</sub> -P-OH<br>HO-CAAG <sup>Me</sup> <sub>AA2/3</sub> -P-OH |
| 25.70                                           | 27.71<br>29.24                                                      | 1259.2<br>1650.2 | 1260.2<br>1651.2 | HO-G <sup>Me</sup> AAC-OH<br>HO-CAAG <sup>Me</sup> <sub>A2', 3'</sub> -cMP                  |
| 26.16                                           |                                                                     | 2222.2           | 2223.4           | Heptamer                                                                                    |
| 26.91                                           |                                                                     | 1588.2           | 1589.3           | HO-AG <sup>Me</sup> AAC-OH                                                                  |
| 28.45                                           |                                                                     | 1917.2           | 1918.3           | HO-AAG <sup>Me</sup> AAC-OH                                                                 |

# RP-Hplc retention times shown represent the first round of Hplc separation, which although showed single peak at times but they were in fact a mixture of constituent oligonucleotides as a result of co-elution as evident by Maldi ToF mass spectrometry.

\*SMART<sup>TM</sup> RP-Hplc retention times shown represent the separation of the constituent oligonucleotides which did not separate by the first round of RP-Hplc separation.

**Table S9(F):****RNA Sequence: 5'-r(CACG<sup>Me</sup>AAC)-3'**

Maldi ToF (Negative ion mode) mass analysis of the degradation products (separated by Hplc analysis) after 1h alkali digestion [Condition: pH 12.5 (0.03N aqueous NaOH) / 20°C, followed by neutralization at pH 7 (see experimentals) ]. For Hplc separation profile, see Fig S12(f2) and Fig S12(f2i). For Mass spectrum, see Fig S12(f1)-(f10).

| RP-Hplc Retention Time (R <sub>T</sub> in min)# | SMART™ RP-Hplc Retention Time (R <sub>T</sub> in min)* | Mass (m/z)         |          | Nucleotide fragment (5'→3')                 |
|-------------------------------------------------|--------------------------------------------------------|--------------------|----------|---------------------------------------------|
|                                                 |                                                        | Observed           | Expected |                                             |
| 19.68                                           |                                                        | 938.2              | 939.1    | HO-CAC <sub>2,3</sub> -cMP                  |
| 21.81                                           |                                                        | 958.2 <sup>§</sup> | 958.1    | HO-CAC <sub>2/3</sub> -P-OH                 |
| 22.89                                           |                                                        | 1297.3             | 1298.2   | HO-CACG <sup>Me</sup> <sub>2,3</sub> -cMP   |
| 23.85                                           |                                                        | 1564.3             | 1565.3   | HO-CG <sup>Me</sup> AAC-OH                  |
| 24.77                                           |                                                        | 1626.3             | 1627.2   | HO-CACG <sup>Me</sup> A <sub>2,3</sub> -cMP |
| 25.93 <sup>§</sup>                              | 25.15                                                  | 902.3 <sup>§</sup> | 901.2    | HO-AAC-OH                                   |
| 26.49 <sup>§</sup>                              | 26.15                                                  | 902.2 <sup>§</sup> | 901.2    | HO-AAC-OH                                   |
|                                                 | 27.71                                                  | 1259.2             | 1260.2   | HO-G <sup>Me</sup> AAC-OH                   |
|                                                 | 29.00                                                  | 1893.4             | 1894.3   | HO-ACG <sup>Me</sup> AAC-OH                 |
|                                                 | 29.91                                                  | 2198.4             | 2199.4   | Heptamer                                    |

# RP-Hplc retention times shown represent the first round of Hplc separation, which although showed single peak at times but they were in fact a mixture of constituent oligonucleotides as a result of co-elution as evident by Maldi ToF mass spectrometry.

\* SMART™ RP-Hplc retention times shown represent the separation of the constituent oligonucleotides which did not separate by the first round of RP-Hplc separation.

<sup>§</sup> Peaks at RT = 25.93' and RT = 26.49' were mixed together and further separated by SMART™ RP-Hplc as they were not completely separated by RP-Hplc.

<sup>§</sup> Mass values obtained in these cases were recorded in positive mode as they were not so clearly seen in negative mode.



**Table S9 (G):****RNA Sequence: 5'-r(CACG<sup>Me</sup>CAC)-3'**

Maldi ToF (Negative ion mode) mass analysis of the degradation products (separated by Hplc analysis) after 1h alkali digestion [Condition: pH 12.5 (0.03N aqueous NaOH) / 20°C, followed by neutralization at pH 7 (see experimentals) ]. For Hplc separation profile, see Fig S12(g2) and Fig S12(g2i)-(g2j). For Mass spectrum, see Fig S12(g1)-(g8).

| RP-Hplc Retention Time (R <sub>T</sub> in min)# | SMART <sup>TM</sup> RP-Hplc Retention Time (R <sub>T</sub> in min)* | Mass (m/z)                                           |                            | Nucleotide fragment (5'→3')                                                                                                         |
|-------------------------------------------------|---------------------------------------------------------------------|------------------------------------------------------|----------------------------|-------------------------------------------------------------------------------------------------------------------------------------|
|                                                 |                                                                     | Observed                                             | Expected                   |                                                                                                                                     |
| 19.68                                           | 20.09<br>20.80                                                      | 876.1<br>938.1                                       | 877.1<br>939.1             | HO-CAC-OH<br>OH-CAC <sub>(2', 3'-cM.P)</sub>                                                                                        |
| 22.55                                           |                                                                     | 1540.2                                               | 1541.3                     | HO-CG <sup>Me</sup> CAC-OH                                                                                                          |
| 23.15                                           | 26.73<br>27.76                                                      | 1235.2 <sup>§</sup><br>1297.2 <sup>§</sup><br>1602.3 | 1236.2<br>1298.2<br>1603.2 | HO-G <sup>Me</sup> CAC-OH<br>HO-CACG <sup>Me</sup> <sub>2', 3'-cMP</sub><br>HO-CACG <sup>Me</sup> <sub>C<sub>2', 3'-cMP</sub></sub> |
| 24.87                                           |                                                                     | 2174.2                                               | 2175.4                     | Heptamer                                                                                                                            |
| 25.82                                           |                                                                     | 1869.3                                               | 1870.3                     | HO-ACG <sup>Me</sup> CAC-OH                                                                                                         |

# RP-Hplc retention times shown represent the first round of Hplc separation, which although showed single peak at times but they were in fact a mixture of constituent oligonucleotides as a result of co-elution as evident by Maldi ToF mass spectrometry.

\* SMART<sup>TM</sup> RP-Hplc retention times shown represent the separation of the constituent oligonucleotides which did not separate by the first round of RP-Hplc separation.

§ These two fragments were not separated in the SMART<sup>TM</sup> RP-Hplc, but could be assigned by careful fraction collection.

Figure S15

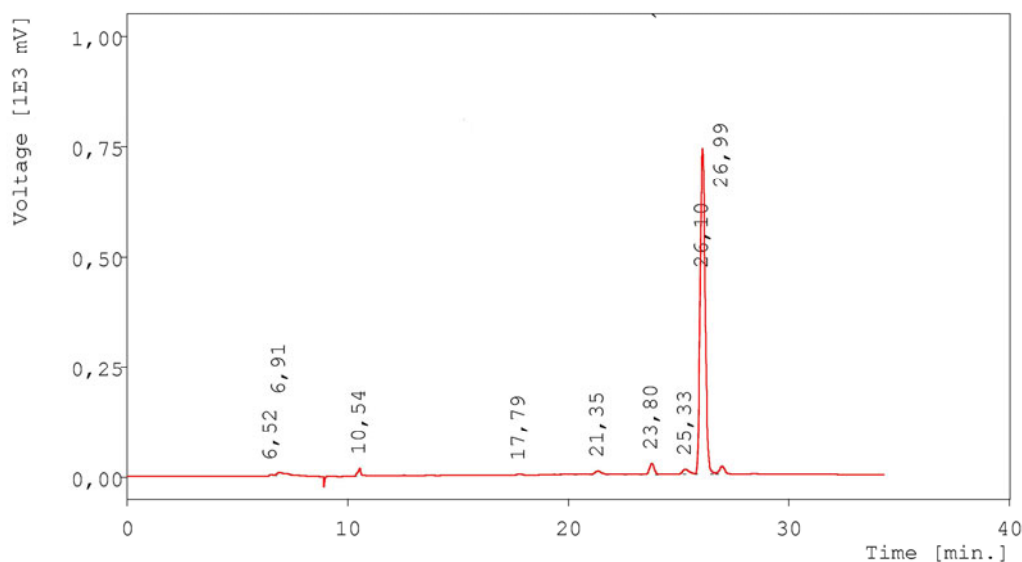

Result Table - Calculation Method Uncal

| Peak No. | Reten. time | Area [mV.s] | Height [mV] | W05 [min.] | Area [%] | Height [%] |
|----------|-------------|-------------|-------------|------------|----------|------------|
| 1        | 6,520       | 37,7321     | 3,513       | 0,193      | 0,277    | 0,422      |
| 2        | 6,907       | 238,1128    | 7,598       | 0,600      | 1,749    | 0,912      |
| 3        | 10,540      | 197,4952    | 18,350      | 0,140      | 1,450    | 2,202      |
| 4        | 17,793      | 46,4480     | 2,767       | 0,280      | 0,341    | 0,332      |
| 5        | 21,353      | 403,4867    | 8,231       | 0,333      | 2,963    | 0,988      |
| 6        | 23,800      | 424,7706    | 24,508      | 0,240      | 3,119    | 2,942      |
| 7        | 25,327      | 254,5428    | 11,184      | 0,340      | 1,869    | 1,342      |
| 8        | 26,100      | 11705,0551  | 739,231     | 0,253      | 85,959   | 88,727     |
| 9        | 26,987      | 309,3050    | 17,767      | 0,260      | 2,273    | 2,133      |
| -        | Total       | 13616,9484  | 833,149     |            |          |            |

**Figure S15(a1):** Hplc analysis of alkaline Hydrolysis products of 5'-r(CAAGAAC)-3' (5b) [after digestion for 0.5h at pH 12.5 using 0.03N NaOH/ 20°C, followed by quenching with 0.03 N aq. acetic acid]. For Hplc conditions see the experimental section in the text.

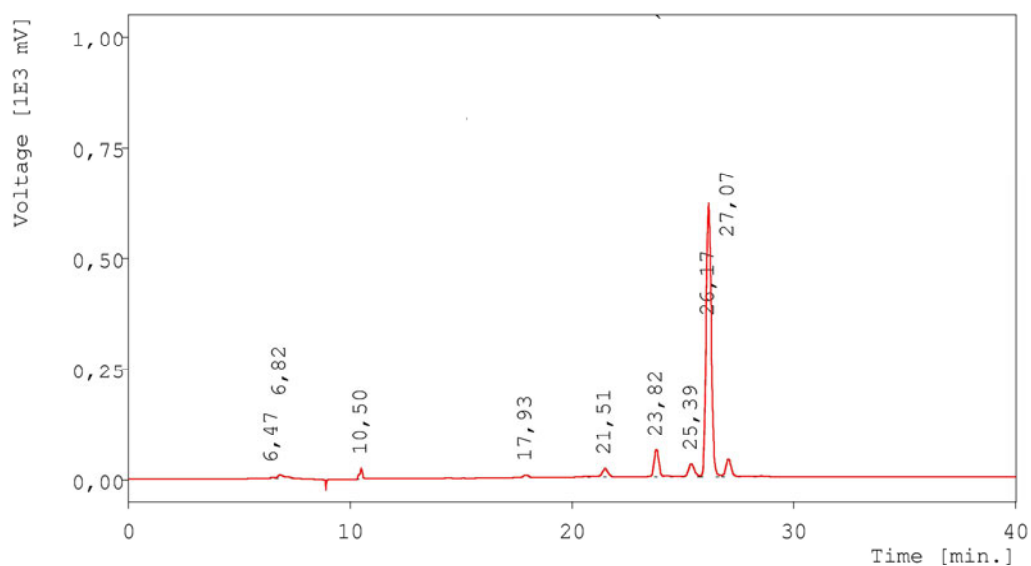

Result Table - Calculation Method Uncal

| Peak No. | Reten. time | Area [mV.s] | Height [mV] | W05 [min.] | Area [%] | Height [%] |
|----------|-------------|-------------|-------------|------------|----------|------------|
| 1        | 6,467       | 36,3770     | 3,313       | 0,207      | 0,271    | 0,411      |
| 2        | 6,820       | 221,5352    | 8,298       | 0,340      | 1,649    | 1,030      |
| 3        | 10,500      | 259,8240    | 23,912      | 0,140      | 1,934    | 2,967      |
| 4        | 17,933      | 135,4907    | 5,917       | 0,280      | 1,009    | 0,734      |
| 5        | 21,507      | 451,5691    | 18,222      | 0,293      | 3,362    | 2,261      |
| 6        | 23,820      | 1040,4692   | 60,572      | 0,240      | 7,747    | 7,517      |
| 7        | 25,393      | 547,4477    | 28,005      | 0,307      | 4,076    | 3,475      |
| 8        | 26,173      | 9987,5615   | 619,199     | 0,260      | 74,360   | 76,838     |
| 9        | 27,067      | 751,1644    | 38,407      | 0,267      | 5,592    | 4,767      |
| -        | Total       | 13431,4387  | 805,845     |            |          |            |

**Figure S15(a2):** Hplc analysis of alkaline Hydrolysis products of **5'-r(CAAGAAC)-3' (5b)** [after digestion for **2h** at pH 12.5 using 0.03N NaOH/ 20°C, followed by quenching with 0.03 N aq. acetic acid]. For Hplc conditions see the experimental section in the text.

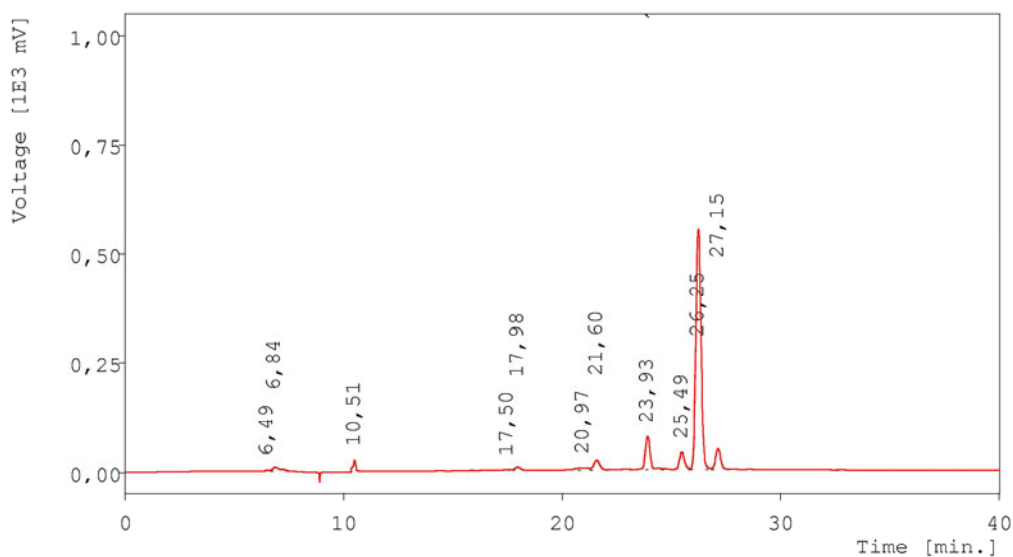

Result Table - Calculation Method Uncal

| Peak No. | Reten. time | Area [mV.s] | Height [mV] | W05 [min.] | Area [%] | Height [%] |
|----------|-------------|-------------|-------------|------------|----------|------------|
| 1        | 6,487       | 35,9054     | 3,178       | 0,227      | 0,268    | 0,403      |
| 2        | 6,840       | 257,5473    | 9,699       | 0,340      | 1,920    | 1,231      |
| 3        | 10,507      | 286,4401    | 26,784      | 0,133      | 2,135    | 3,399      |
| 4        | 17,500      | 116,6701    | 1,880       | 0,440      | 0,870    | 0,239      |
| 5        | 17,980      | 130,8699    | 7,065       | 0,273      | 0,976    | 0,897      |
| 6        | 20,973      | 185,0896    | 4,466       | 0,733      | 1,380    | 0,567      |
| 7        | 21,600      | 427,2599    | 21,848      | 0,300      | 3,185    | 2,773      |
| 8        | 23,927      | 1323,4639   | 74,588      | 0,240      | 9,866    | 9,466      |
| 9        | 25,493      | 663,5156    | 39,366      | 0,260      | 4,946    | 4,996      |
| 10       | 26,247      | 9140,6213   | 552,293     | 0,260      | 68,139   | 70,090     |
| 11       | 27,153      | 847,2531    | 46,811      | 0,267      | 6,315    | 5,939      |
| -        | Total       | 13414,6361  | 787,977     |            |          |            |

**Figure S15(a3):** Hplc analysis of alkaline Hydrolysis products of **5'-r(CAAGAAC)-3' (5b)** [after digestion for **3h** at pH 12.5 using 0.03N NaOH/ 20°C, followed by quenching with 0.03 N aq. acetic acid]. For Hplc conditions see the experimental section in the text.

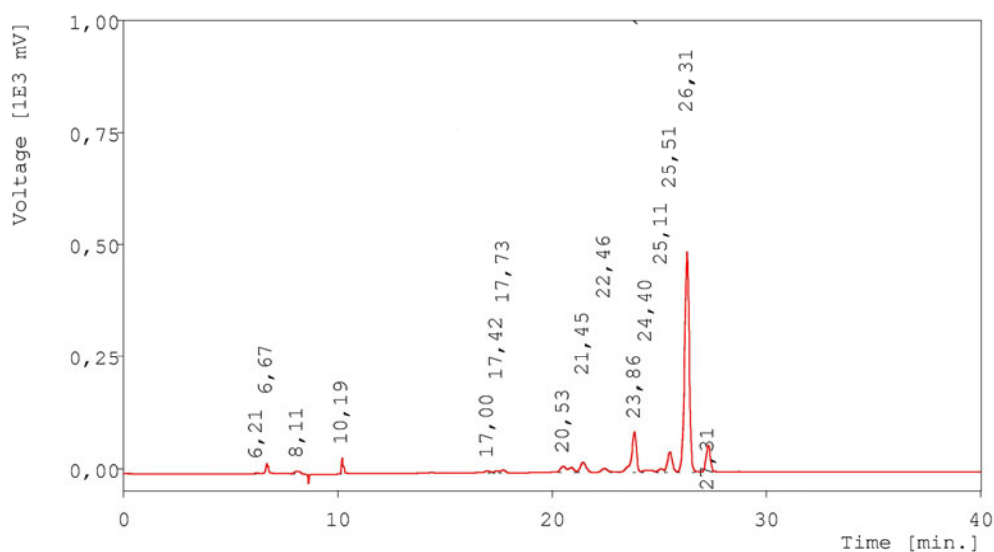

Result Table - Calculation Method Uncal

| Peak No. | Reten. time | Area [mV.s] | Height [mV] | W05 [min.] | Area [%] | Height [%] |
|----------|-------------|-------------|-------------|------------|----------|------------|
| 1        | 6,207       | 18,2905     | 2,094       | 0,180      | 0,142    | 0,253      |
| 2        | 6,673       | 193,7997    | 22,196      | 0,133      | 1,502    | 2,681      |
| 3        | 8,107       | 124,2297    | 6,487       | 0,313      | 0,963    | 0,784      |
| 4        | 10,193      | 266,1397    | 35,761      | 0,093      | 2,063    | 4,319      |
| 5        | 17,000      | 102,2840    | 4,969       | 0,260      | 0,793    | 0,600      |
| 6        | 17,420      | 65,0022     | 4,732       | 0,240      | 0,504    | 0,572      |
| 7        | 17,733      | 105,1835    | 6,247       | 0,320      | 0,815    | 0,755      |
| 8        | 20,533      | 557,1425    | 14,456      | 0,653      | 4,318    | 1,746      |
| 9        | 21,453      | 453,6046    | 23,630      | 0,293      | 3,515    | 2,854      |
| 10       | 22,460      | 217,5851    | 9,052       | 0,320      | 1,686    | 1,093      |
| 11       | 23,860      | 1477,3307   | 89,484      | 0,227      | 11,449   | 10,808     |
| 12       | 24,400      | 157,4211    | 4,729       | 0,600      | 1,220    | 0,571      |
| 13       | 25,107      | 128,1819    | 8,064       | 0,287      | 0,993    | 0,974      |
| 14       | 25,513      | 720,7928    | 46,128      | 0,247      | 5,586    | 5,572      |
| 15       | 26,313      | 7404,6450   | 491,151     | 0,233      | 57,384   | 59,324     |
| 16       | 27,307      | 911,9771    | 58,737      | 0,233      | 7,067    | 7,094      |
| -        | Total       | 12903,6100  | 827,917     |            |          |            |

**Figure S15(a4):** Hplc analysis of alkaline Hydrolysis products of 5'-r(CAAGAAC)-3' (5b) [after digestion for 4h at pH 12.5 using 0.03N NaOH/ 20°C, followed by quenching with 0.03 N aq. acetic acid]. For Hplc conditions see the experimental section in the text.

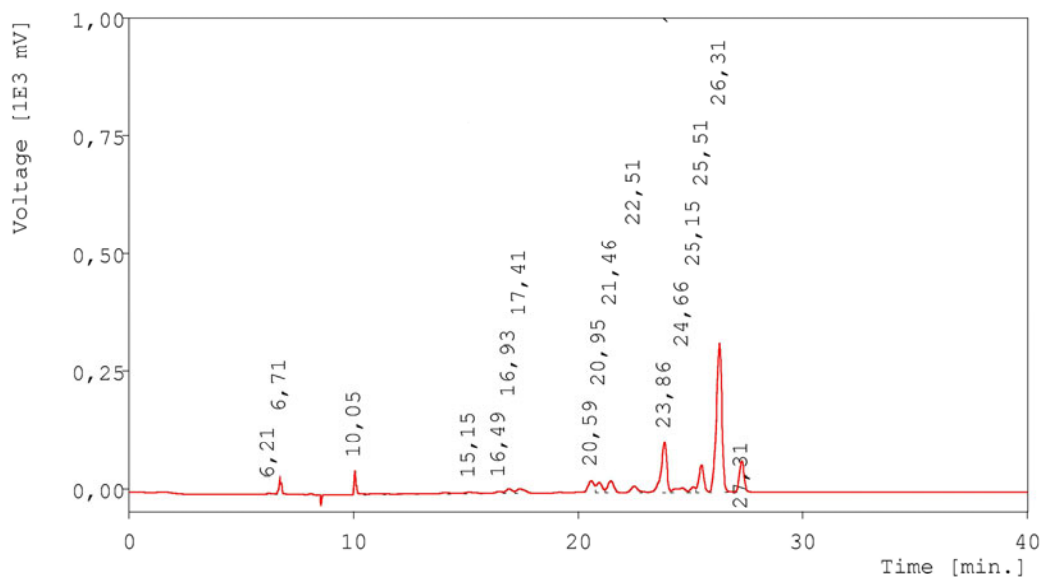

Result Table - Calculation Method Uncal

| Peak No. | Reten. time | Area [mV.s] | Height [mV] | W05 [min.] | Area [%] | Height [%] |
|----------|-------------|-------------|-------------|------------|----------|------------|
| 1        | 6,213       | 30,6613     | 2,196       | 0,313      | 0,238    | 0,287      |
| 2        | 6,713       | 267,5502    | 36,868      | 0,127      | 2,075    | 4,815      |
| 3        | 10,053      | 320,0433    | 49,280      | 0,087      | 2,482    | 6,436      |
| 4        | 15,153      | 392,6544    | 3,187       | 0,660      | 3,045    | 0,416      |
| 5        | 16,493      | 91,9838     | 4,310       | 0,333      | 0,713    | 0,563      |
| 6        | 16,927      | 193,1086    | 9,754       | 0,340      | 1,498    | 1,274      |
| 7        | 17,407      | 247,6733    | 9,425       | 0,467      | 1,921    | 1,231      |
| 8        | 20,593      | 443,0554    | 24,821      | 0,340      | 3,436    | 3,242      |
| 9        | 20,953      | 379,0658    | 21,112      | 0,327      | 2,940    | 2,757      |
| 10       | 21,460      | 474,6845    | 24,924      | 0,313      | 3,681    | 3,255      |
| 11       | 22,513      | 308,9676    | 13,730      | 0,320      | 2,396    | 1,793      |
| 12       | 23,860      | 1902,6374   | 107,444     | 0,253      | 14,755   | 14,032     |
| 13       | 24,660      | 318,6712    | 9,594       | 0,613      | 2,471    | 1,253      |
| 14       | 25,153      | 170,2561    | 11,666      | 0,253      | 1,320    | 1,524      |
| 15       | 25,513      | 885,6459    | 56,632      | 0,247      | 6,868    | 7,396      |
| 16       | 26,307      | 5480,4235   | 315,577     | 0,267      | 42,502   | 41,214     |
| 17       | 27,307      | 987,4330    | 65,188      | 0,240      | 7,659    | 8,512      |
| -        | Total       | 12894,5152  | 765,710     |            |          |            |

**Figure S15(a5):** Hplc analysis of alkaline Hydrolysis products of 5'-r(CAAGAAC)-3' (5b) [after digestion for 8h at pH 12.5 using 0.03N NaOH/ 20°C, followed by quenching with 0.03 N aq. acetic acid]. For Hplc conditions see the experimental section in the text.

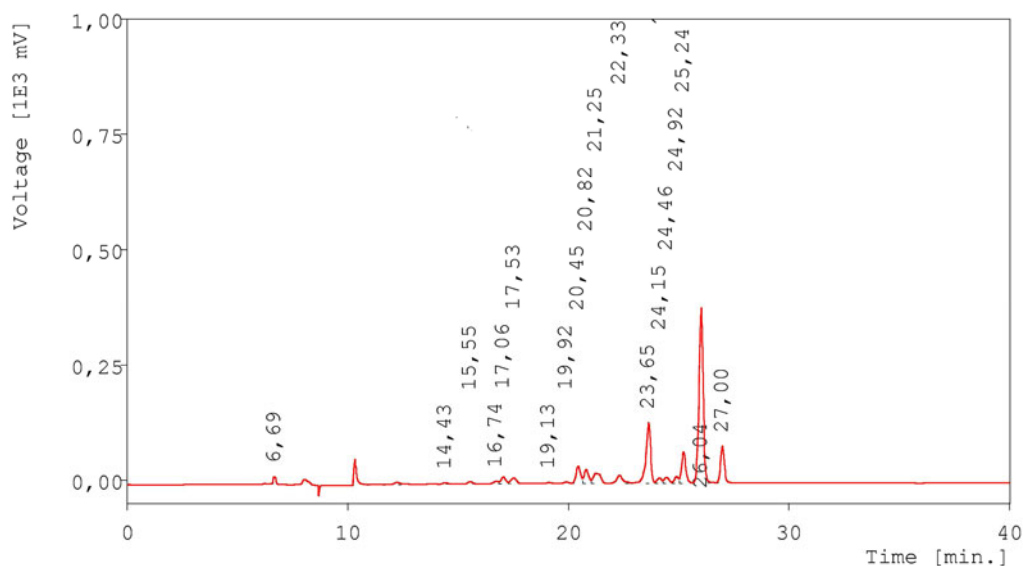

Result Table - Calculation Method Uncal

| Peak No. | Reten. time | Area [mV.s] | Height [mV] | W05 [min.] | Area [%] | Height [%] |
|----------|-------------|-------------|-------------|------------|----------|------------|
| 1        | 6,687       | 131,6760    | 15,320      | 0,147      | 1,018    | 1,772      |
| 2        | 14,433      | 820,9082    | 3,489       | 0,227      | 6,349    | 0,404      |
| 3        | 15,553      | 85,9295     | 4,936       | 0,240      | 0,665    | 0,571      |
| 4        | 16,740      | 84,8188     | 5,364       | 0,260      | 0,656    | 0,621      |
| 5        | 17,060      | 217,6540    | 14,523      | 0,240      | 1,683    | 1,680      |
| 6        | 17,533      | 220,0752    | 12,088      | 0,300      | 1,702    | 1,398      |
| 7        | 19,133      | 38,3481     | 2,203       | 0,247      | 0,297    | 0,255      |
| 8        | 19,920      | 47,0893     | 3,191       | 0,240      | 0,364    | 0,369      |
| 9        | 20,453      | 529,9213    | 37,098      | 0,233      | 4,099    | 4,292      |
| 10       | 20,820      | 433,2688    | 29,656      | 0,240      | 3,351    | 3,431      |
| 11       | 21,253      | 510,7443    | 21,831      | 0,393      | 3,950    | 2,526      |
| 12       | 22,327      | 337,5911    | 17,666      | 0,260      | 2,611    | 2,044      |
| 13       | 23,653      | 1936,4285   | 131,083     | 0,213      | 14,977   | 15,165     |
| 14       | 24,147      | 160,0244    | 11,268      | 0,273      | 1,238    | 1,304      |
| 15       | 24,460      | 198,6326    | 12,705      | 0,267      | 1,536    | 1,470      |
| 16       | 24,920      | 172,8673    | 14,035      | 0,220      | 1,337    | 1,624      |
| 17       | 25,240      | 891,4282    | 67,283      | 0,207      | 6,895    | 7,784      |
| 18       | 26,040      | 5122,9644   | 381,106     | 0,207      | 39,624   | 44,090     |
| 19       | 27,000      | 988,7036    | 79,532      | 0,193      | 7,648    | 9,200      |
| -        | Total       | 12929,0737  | 864,377     |            |          |            |

**Figure S15(a6):** Hplc analysis of alkaline Hydrolysis products of **5'-r(CAAGAAC)-3' (5b)** [after digestion for **15h** at pH 12.5 using 0.03N NaOH/ 20°C, followed by quenching with 0.03 N aq. acetic acid]. For Hplc conditions see the experimental section in the text.

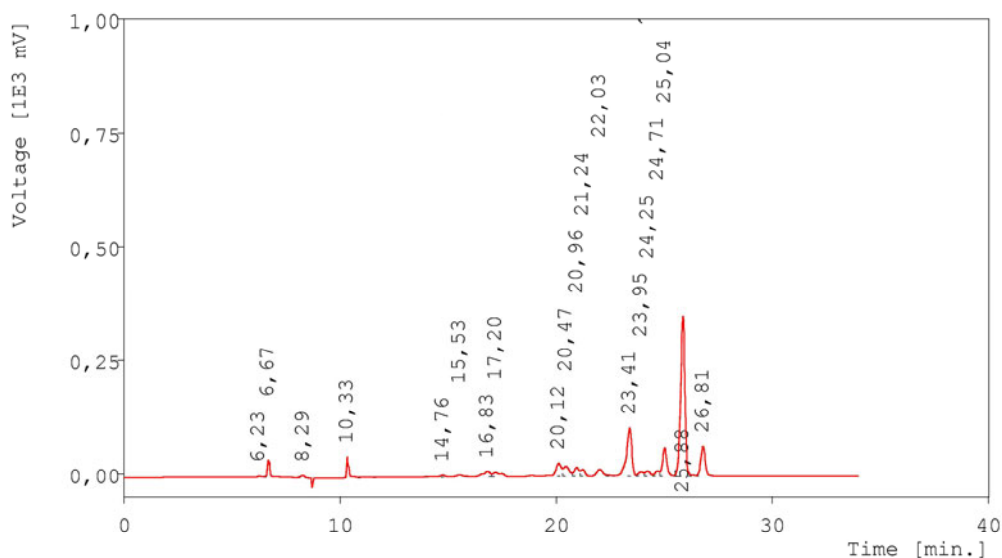

Result Table - Calculation Method Uncal

| Peak No. | Reten. time | Area [mV.s] | Height [mV] | W05 [min.] | Area [%] | Height [%] |
|----------|-------------|-------------|-------------|------------|----------|------------|
| 1        | 6,233       | 33,8869     | 2,340       | 0,287      | 0,270    | 0,279      |
| 2        | 6,667       | 332,7088    | 38,138      | 0,133      | 2,651    | 4,545      |
| 3        | 8,287       | 74,6112     | 5,174       | 0,233      | 0,594    | 0,617      |
| 4        | 10,327      | 406,8555    | 45,945      | 0,120      | 3,241    | 5,476      |
| 5        | 14,760      | 211,1290    | 4,089       | 0,260      | 1,682    | 0,487      |
| 6        | 15,527      | 124,2514    | 4,660       | 0,300      | 0,990    | 0,555      |
| 7        | 16,833      | 280,2987    | 12,170      | 0,340      | 2,233    | 1,450      |
| 8        | 17,200      | 245,8522    | 8,908       | 0,560      | 1,959    | 1,062      |
| 9        | 20,120      | 518,2402    | 28,465      | 0,320      | 4,129    | 3,392      |
| 10       | 20,467      | 418,4589    | 21,956      | 0,327      | 3,334    | 2,617      |
| 11       | 20,960      | 294,8794    | 19,671      | 0,280      | 2,349    | 2,344      |
| 12       | 21,240      | 213,5767    | 14,913      | 0,247      | 1,702    | 1,777      |
| 13       | 22,027      | 323,7528    | 15,447      | 0,293      | 2,579    | 1,841      |
| 14       | 23,413      | 1843,0541   | 105,801     | 0,247      | 14,684   | 12,609     |
| 15       | 23,947      | 158,0772    | 9,775       | 0,287      | 1,259    | 1,165      |
| 16       | 24,247      | 180,8290    | 11,052      | 0,300      | 1,441    | 1,317      |
| 17       | 24,707      | 163,7529    | 11,770      | 0,240      | 1,305    | 1,403      |
| 18       | 25,040      | 858,5058    | 61,664      | 0,213      | 6,840    | 7,349      |
| 19       | 25,880      | 4916,3103   | 352,088     | 0,213      | 39,168   | 41,961     |
| 20       | 26,813      | 952,6837    | 65,050      | 0,227      | 7,590    | 7,754      |
| -        | Total       | 12551,7148  | 839,077     |            |          |            |

**Figure S15(a7):** Hplc analysis of alkaline Hydrolysis products of **5'-r(CAAGAAC)-3' (5b)** [after digestion for **27h** at pH 12.5 using 0.03N NaOH/ 20°C, followed by quenching with 0.03 N aq. acetic acid]. For Hplc conditions see the experimental section in the text.



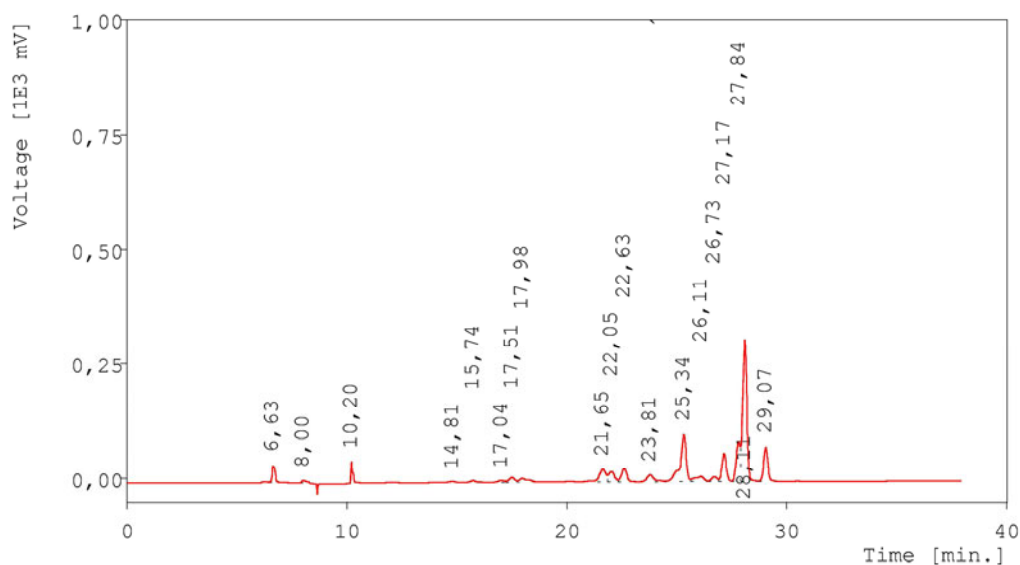

Result Table - Calculation Method Uncal

| Peak No. | Reten. time | Area [mV.s] | Height [mV] | W05 [min.] | Area [%] | Height [%] |
|----------|-------------|-------------|-------------|------------|----------|------------|
| 1        | 6,627       | 357,0812    | 38,052      | 0,160      | 2,727    | 4,312      |
| 2        | 8,000       | 118,7661    | 6,458       | 0,300      | 0,907    | 0,732      |
| 3        | 10,200      | 336,2298    | 49,714      | 0,087      | 2,568    | 5,634      |
| 4        | 14,813      | 45,7420     | 2,292       | 0,340      | 0,349    | 0,260      |
| 5        | 15,740      | 74,6199     | 4,096       | 0,233      | 0,570    | 0,464      |
| 6        | 17,040      | 83,9304     | 4,454       | 0,327      | 0,641    | 0,505      |
| 7        | 17,513      | 194,3911    | 10,710      | 0,287      | 1,484    | 1,214      |
| 8        | 17,980      | 240,4557    | 8,443       | 0,553      | 1,836    | 0,957      |
| 9        | 21,653      | 606,1735    | 27,999      | 0,373      | 4,629    | 3,173      |
| 10       | 22,053      | 436,9009    | 22,819      | 0,340      | 3,336    | 2,586      |
| 11       | 22,627      | 500,2394    | 29,309      | 0,267      | 3,820    | 3,321      |
| 12       | 23,807      | 350,9853    | 15,117      | 0,320      | 2,680    | 1,713      |
| 13       | 25,340      | 2012,1119   | 103,530     | 0,240      | 15,366   | 11,732     |
| 14       | 26,113      | 347,3010    | 11,257      | 0,587      | 2,652    | 1,276      |
| 15       | 26,727      | 190,6035    | 10,903      | 0,313      | 1,456    | 1,236      |
| 16       | 27,167      | 883,8266    | 62,810      | 0,227      | 6,749    | 7,118      |
| 17       | 27,840      | 1084,6684   | 87,987      | 0,213      | 8,283    | 9,971      |
| 18       | 28,113      | 4196,7872   | 309,703     | 0,207      | 32,049   | 35,095     |
| 19       | 29,067      | 1034,0275   | 76,805      | 0,207      | 7,898    | 8,701      |
| -        | Total       | 13094,8414  | 882,458     |            |          |            |

**Figure S15(a8):** Hplc analysis of alkaline Hydrolysis products of 5'-r(CAAGAAC)-3' (**5b**) [after digestion for **48h** at pH 12.5 using 0.03N NaOH/ 20°C, followed by quenching with 0.03 N aq. acetic acid]. For Hplc conditions see the experimental section in the text.
