# Supplementary material for: Non-identical electronic characters of the internucleotidic phosphates in RNA modulate the chemical reactivity of the phosphodiester bonds
Source: Royal Society of Chemistry journal article supplement (doi:10.1039/b516733g), 2006-01-01
Supplement: b516733g_7.pdf [file b516733g_7.pdf]

## Electronic Supplementary Information 7

### Non-identical Electronic Characters of the Internucleotidic Phosphates in RNA Modulate the Chemical Reactivity of the Phosphodiester Bonds

Jharna Barman<sup>1</sup>, Sandipta Acharya<sup>1</sup>, Chuanzheng Zhou<sup>1</sup>, Subhrangsu Chatterjee<sup>1</sup>, Åke Engström<sup>2</sup>, and Jyoti Chattopadhyaya<sup>1\*</sup>

<sup>1</sup>Department of Bioorganic Chemistry, Box 581, Biomedical Center, Uppsala University, S-751 23 Uppsala, Sweden

<sup>2</sup>Department of Medical Biochemistry and Microbiology, Box 582, Biomedical Center, Uppsala University, S-751 23 Uppsala, Sweden

[jyoti@boc.uu.se](mailto:jyoti@boc.uu.se)

#### Content:

**Figure S15C.** Panels (c1) – (c8) show the RP-Hplc and SMART™ RP-Hplc profiles at ½, 2, 3, 4, 8, 15, 27, 48 h of alkali digestion of native heptamer **5'-r(CACGAAC)-3'** (7b). **p. S2 – S9**

Figure S15C

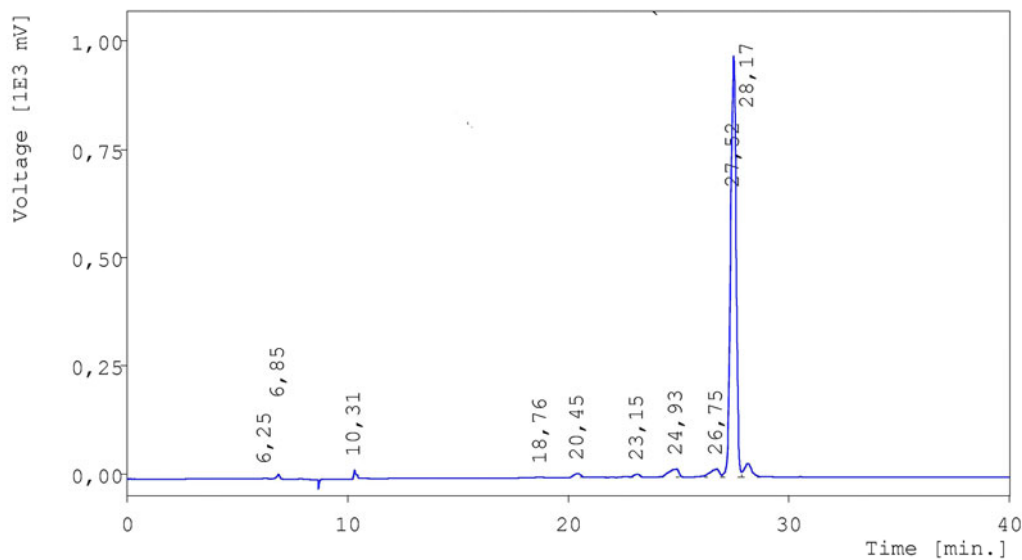

Result Table - Calculation Method Uncal

| Peak No. | Reten. time | Area [mV.s] | Height [mV] | W05 [min.] | Area [%] | Height [%] |
|----------|-------------|-------------|-------------|------------|----------|------------|
| 1        | 6,247       | 27,7929     | 2,248       | 0,207      | 0,141    | 0,205      |
| 2        | 6,853       | 114,7137    | 11,321      | 0,140      | 0,581    | 1,031      |
| 3        | 10,307      | 211,4381    | 21,306      | 0,120      | 1,072    | 1,941      |
| 4        | 18,760      | 47,3597     | 2,233       | 0,367      | 0,240    | 0,203      |
| 5        | 20,453      | 255,7330    | 10,147      | 0,353      | 1,296    | 0,924      |
| 6        | 23,153      | 118,5945    | 7,016       | 0,293      | 0,601    | 0,639      |
| 7        | 24,927      | 630,2361    | 19,122      | 0,560      | 3,194    | 1,742      |
| 8        | 26,753      | 592,2369    | 18,847      | 0,493      | 3,002    | 1,717      |
| 9        | 27,520      | 16974,1040  | 973,856     | 0,287      | 86,028   | 88,728     |
| 10       | 28,167      | 758,7247    | 31,480      | 0,380      | 3,845    | 2,870      |
| -        | Total       | 19730,9337  | 1097,576    |            |          |            |

**Figure S15(c1):** RP-Hplc analysis of alkaline Hydrolysis products of **5'-r(CACGAAC)-3' (7b)** [after digestion for **0.5h** at pH 12.5 using 0.03N NaOH/ 20°C, followed by quenching with 0.03 N aq. acetic acid]. For Hplc conditions see the experimental section in the text.

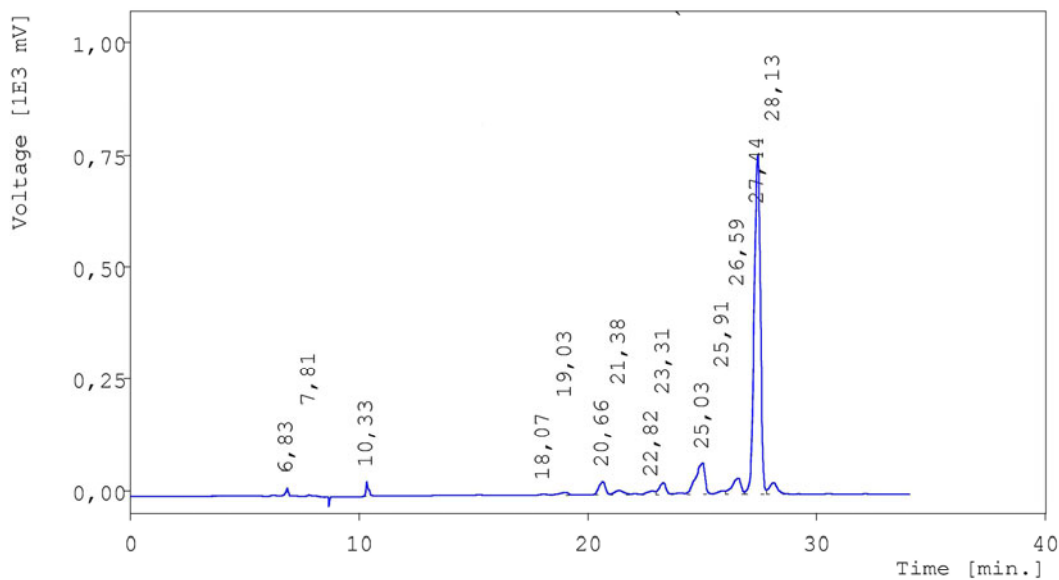

Result Table - Calculation Method Uncal

| Peak No. | Reten. time | Area [mV.s] | Height [mV] | W05 [min.] | Area [%] | Height [%] |
|----------|-------------|-------------|-------------|------------|----------|------------|
| 1        | 6,833       | 135,4034    | 17,716      | 0,100      | 0,652    | 1,711      |
| 2        | 7,807       | 28,7554     | 2,984       | 0,133      | 0,139    | 0,288      |
| 3        | 10,327      | 292,9860    | 33,735      | 0,100      | 1,412    | 3,258      |
| 4        | 18,067      | 68,0788     | 2,642       | 0,313      | 0,328    | 0,255      |
| 5        | 19,033      | 185,1811    | 6,286       | 0,407      | 0,892    | 0,607      |
| 6        | 20,660      | 613,9674    | 29,368      | 0,333      | 2,959    | 2,836      |
| 7        | 21,380      | 341,0867    | 9,677       | 0,460      | 1,644    | 0,935      |
| 8        | 22,820      | 200,0463    | 8,389       | 0,420      | 0,964    | 0,810      |
| 9        | 23,313      | 553,2923    | 26,555      | 0,333      | 2,666    | 2,565      |
| 10       | 25,033      | 2106,0838   | 69,557      | 0,453      | 10,149   | 6,718      |
| 11       | 25,913      | 180,2664    | 7,800       | 0,360      | 0,869    | 0,753      |
| 12       | 26,587      | 976,7549    | 36,201      | 0,407      | 4,707    | 3,496      |
| 13       | 27,440      | 14437,2045  | 758,864     | 0,313      | 69,570   | 73,291     |
| 14       | 28,127      | 632,9763    | 25,639      | 0,387      | 3,049    | 2,477      |
| -        | Total       | 20752,0833  | 1035,413    |            |          |            |

**Figure S15(c2):** RP-Hplc analysis of alkaline Hydrolysis products of **5'-r(CACGAAC)-3' (7b)** [after digestion for **2h** at pH 12.5 using 0.03N NaOH/ 20°C, followed by quenching with 0.03 N aq. acetic acid]. For Hplc conditions see the experimental section in the text.

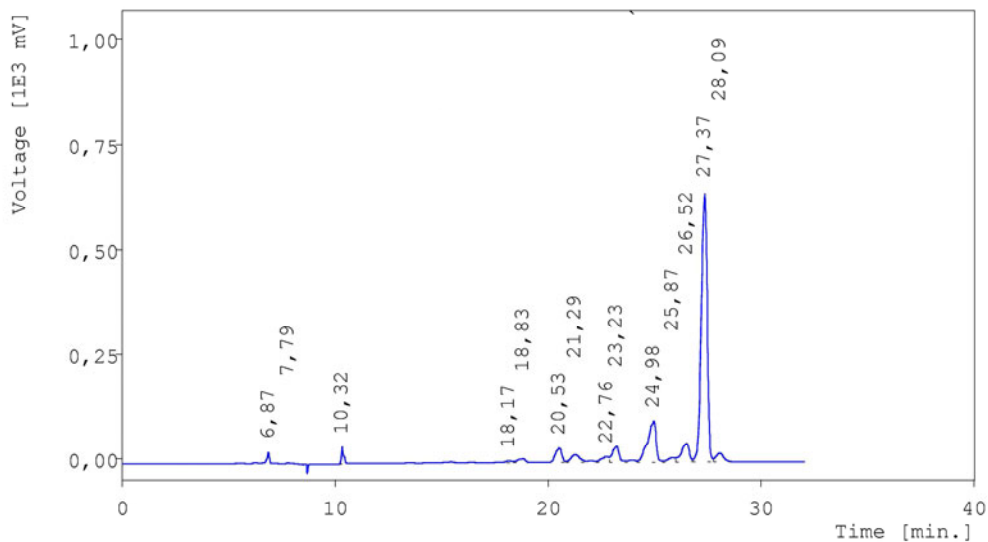

Result Table - Calculation Method Uncal

| Peak No. | Reten. time | Area [mV.s] | Height [mV] | W05 [min.] | Area [%] | Height [%] |
|----------|-------------|-------------|-------------|------------|----------|------------|
| 1        | 6,867       | 199,6093    | 25,418      | 0,107      | 0,961    | 2,536      |
| 2        | 7,793       | 26,0013     | 2,728       | 0,147      | 0,125    | 0,272      |
| 3        | 10,320      | 347,3141    | 40,882      | 0,107      | 1,672    | 4,079      |
| 4        | 18,167      | 111,4454    | 4,736       | 0,367      | 0,536    | 0,473      |
| 5        | 18,827      | 236,1480    | 8,846       | 0,433      | 1,137    | 0,883      |
| 6        | 20,533      | 740,7861    | 33,993      | 0,353      | 3,565    | 3,391      |
| 7        | 21,293      | 643,7111    | 18,589      | 0,460      | 3,098    | 1,855      |
| 8        | 22,760      | 330,0567    | 13,680      | 0,427      | 1,589    | 1,365      |
| 9        | 23,227      | 972,5792    | 37,543      | 0,353      | 4,681    | 3,746      |
| 10       | 24,980      | 2738,5321   | 98,445      | 0,400      | 13,180   | 9,822      |
| 11       | 25,867      | 266,2907    | 10,980      | 0,380      | 1,282    | 1,096      |
| 12       | 26,520      | 1143,8013   | 44,298      | 0,393      | 5,505    | 4,420      |
| 13       | 27,373      | 12481,6637  | 641,307     | 0,320      | 60,074   | 63,983     |
| 14       | 28,087      | 539,2216    | 20,868      | 0,407      | 2,595    | 2,079      |
| -        | Total       | 20777,1606  | 1002,313    |            |          |            |

**Figure S15(c3):** RP-Hplc analysis of alkaline Hydrolysis products of 5'-r(CACGAAC)-3' (7b) [after digestion for 3h at pH 12.5 using 0.03N NaOH/ 20°C, followed by quenching with 0.03 N aq. acetic acid]. For Hplc conditions see the experimental section in the text.

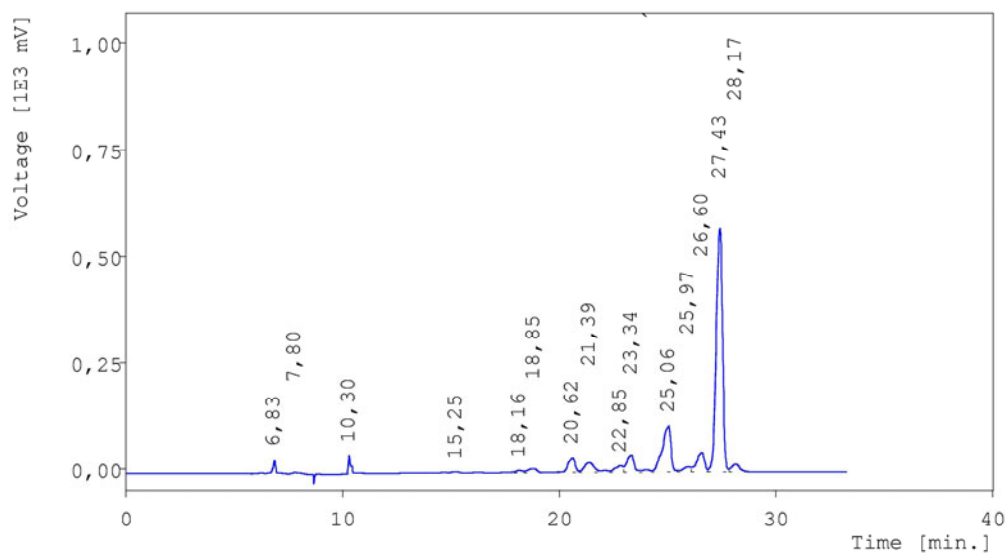

Result Table - Calculation Method Uncal

| Peak No. | Reten. time | Area [mV.s] | Height [mV] | W05 [min.] | Area [%] | Height [%] |
|----------|-------------|-------------|-------------|------------|----------|------------|
| 1        | 6,833       | 254,3588    | 31,486      | 0,113      | 1,196    | 3,231      |
| 2        | 7,800       | 34,8544     | 3,188       | 0,160      | 0,164    | 0,327      |
| 3        | 10,300      | 396,1694    | 44,518      | 0,113      | 1,863    | 4,569      |
| 4        | 15,253      | 106,7951    | 3,053       | 0,407      | 0,502    | 0,313      |
| 5        | 18,160      | 213,9697    | 5,499       | 0,407      | 1,006    | 0,564      |
| 6        | 18,847      | 283,3333    | 9,333       | 0,500      | 1,333    | 0,958      |
| 7        | 20,620      | 850,0828    | 35,937      | 0,367      | 3,998    | 3,688      |
| 8        | 21,393      | 859,4365    | 23,872      | 0,500      | 4,042    | 2,450      |
| 9        | 22,847      | 407,7998    | 16,067      | 0,453      | 1,918    | 1,649      |
| 10       | 23,340      | 1139,4480   | 41,479      | 0,373      | 5,359    | 4,257      |
| 11       | 25,060      | 3065,0115   | 108,781     | 0,413      | 14,415   | 11,164     |
| 12       | 25,967      | 320,9417    | 12,523      | 0,400      | 1,509    | 1,285      |
| 13       | 26,600      | 1194,5280   | 46,452      | 0,393      | 5,618    | 4,767      |
| 14       | 27,433      | 11638,0923  | 573,365     | 0,327      | 54,734   | 58,843     |
| 15       | 28,167      | 498,2173    | 18,850      | 0,413      | 2,343    | 1,935      |
| -        | Total       | 21263,0386  | 974,405     |            |          |            |

**Figure S15(c4):** RP-Hplc analysis of alkaline Hydrolysis products of **5'-r(CACGAAC)-3' (7b)** [after digestion for **4h** at pH 12.5 using 0.03N NaOH/ 20°C, followed by quenching with 0.03 N aq. acetic acid]. For Hplc conditions see the experimental section in the text.

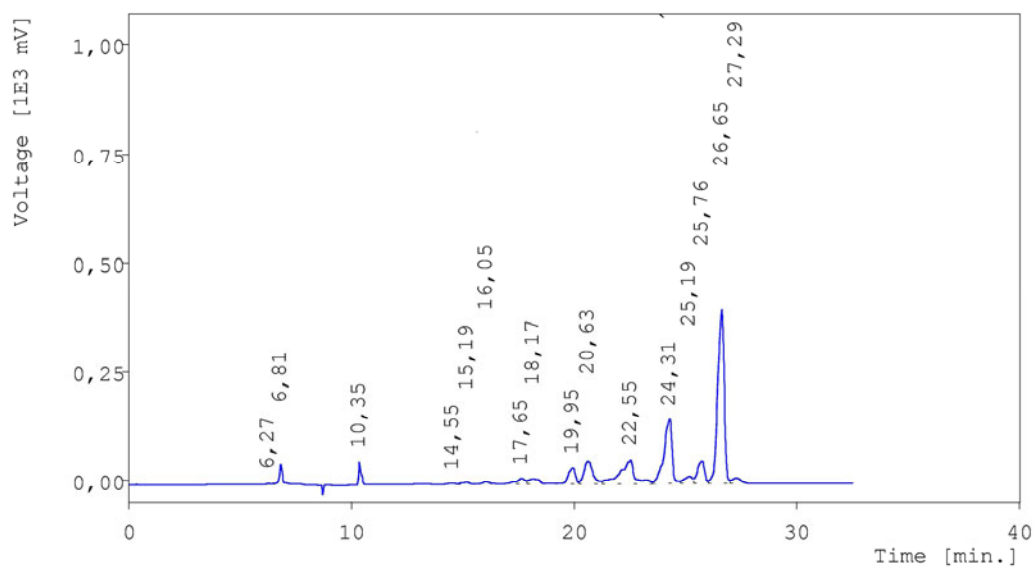

Result Table - Calculation Method Uncal

| Peak No. | Reten. time | Area [mV.s] | Height [mV] | W05 [min.] | Area [%] | Height [%] |
|----------|-------------|-------------|-------------|------------|----------|------------|
| 1        | 6,267       | 26,0389     | 2,142       | 0,213      | 0,127    | 0,235      |
| 2        | 6,807       | 465,9417    | 46,532      | 0,133      | 2,268    | 5,111      |
| 3        | 10,353      | 486,5589    | 53,096      | 0,113      | 2,368    | 5,832      |
| 4        | 14,553      | 52,0371     | 2,553       | 0,353      | 0,253    | 0,280      |
| 5        | 15,187      | 112,2625    | 4,332       | 0,433      | 0,546    | 0,476      |
| 6        | 16,047      | 150,2576    | 5,834       | 0,340      | 0,731    | 0,641      |
| 7        | 17,647      | 372,9742    | 13,097      | 0,407      | 1,815    | 1,439      |
| 8        | 18,173      | 429,5168    | 11,834      | 0,613      | 2,090    | 1,300      |
| 9        | 19,947      | 818,1920    | 37,117      | 0,353      | 3,982    | 4,077      |
| 10       | 20,627      | 1444,0259   | 51,850      | 0,413      | 7,028    | 5,696      |
| 11       | 22,553      | 2455,9158   | 54,111      | 0,593      | 11,953   | 5,944      |
| 12       | 24,307      | 3733,9038   | 147,749     | 0,360      | 18,173   | 16,230     |
| 13       | 25,193      | 410,4683    | 16,206      | 0,460      | 1,998    | 1,780      |
| 14       | 25,760      | 1149,0057   | 51,667      | 0,353      | 5,592    | 5,675      |
| 15       | 26,647      | 8101,9685   | 400,240     | 0,333      | 39,433   | 43,965     |
| 16       | 27,293      | 337,1603    | 11,999      | 0,500      | 1,643    | 1,319      |
| -        | Total       | 20546,2279  | 910,358     |            |          |            |

**Figure S15(c5):** RP-Hplc analysis of alkaline Hydrolysis products of **5'-r(CACGAAC)-3' (7b)** [after digestion for **8h** at pH 12.5 using 0.03N NaOH/ 20°C, followed by quenching with 0.03 N aq. acetic acid]. For Hplc conditions see the experimental section in the text.

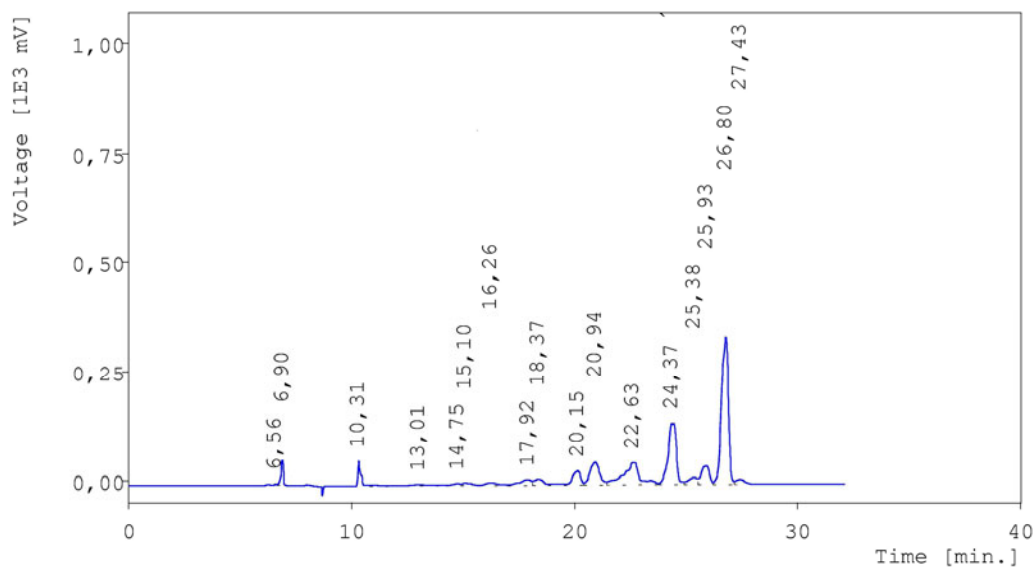

Result Table - Calculation Method Uncal

| Peak No. | Reten. time | Area [mV.s] | Height [mV] | W05 [min.] | Area [%] | Height [%] |
|----------|-------------|-------------|-------------|------------|----------|------------|
| 1        | 6,560       | 16,3190     | 2,596       | 0,113      | 0,078    | 0,305      |
| 2        | 6,900       | 443,6786    | 56,430      | 0,113      | 2,133    | 6,638      |
| 3        | 10,313      | 603,0884    | 57,226      | 0,120      | 2,899    | 6,732      |
| 4        | 13,013      | 289,6031    | 3,477       | 1,527      | 1,392    | 0,409      |
| 5        | 14,753      | 124,1227    | 5,103       | 0,400      | 0,597    | 0,600      |
| 6        | 15,100      | 190,5189    | 6,420       | 0,533      | 0,916    | 0,755      |
| 7        | 16,260      | 265,9078    | 6,453       | 0,560      | 1,278    | 0,759      |
| 8        | 17,920      | 474,5340    | 13,126      | 0,527      | 2,281    | 1,544      |
| 9        | 18,373      | 413,1389    | 14,578      | 0,527      | 1,986    | 1,715      |
| 10       | 20,147      | 926,1658    | 33,025      | 0,393      | 4,452    | 3,885      |
| 11       | 20,940      | 1591,3349   | 52,049      | 0,480      | 7,649    | 6,123      |
| 12       | 22,633      | 2590,1504   | 51,289      | 0,600      | 12,449   | 6,033      |
| 13       | 24,367      | 3693,9814   | 141,143     | 0,387      | 17,755   | 16,603     |
| 14       | 25,380      | 443,2384    | 15,987      | 0,473      | 2,130    | 1,881      |
| 15       | 25,933      | 1086,9508   | 42,868      | 0,407      | 5,224    | 5,043      |
| 16       | 26,800      | 7318,5751   | 337,204     | 0,360      | 35,176   | 39,666     |
| 17       | 27,433      | 334,0173    | 11,140      | 0,493      | 1,605    | 1,309      |
| -        | Total       | 20805,3255  | 850,113     |            |          |            |

**Figure S15(c6):** RP-Hplc analysis of alkaline Hydrolysis products of 5'-r(CACGAAC)-3' (7b) [after digestion for 15h at pH 12.5 using 0.03N NaOH/ 20°C, followed by quenching with 0.03 N aq. acetic acid]. For Hplc conditions see the experimental section in the text.

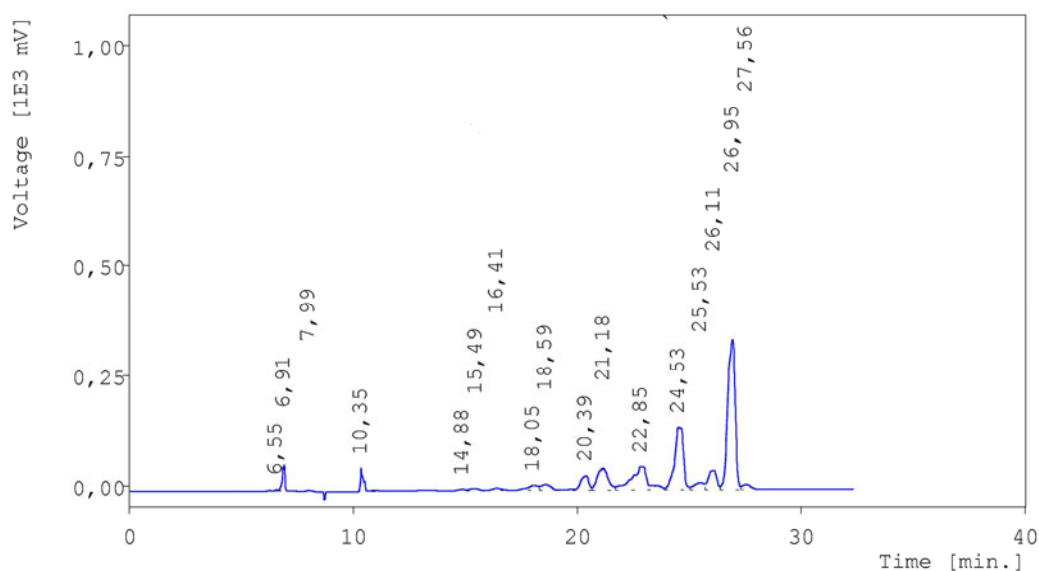

Result Table - Calculation Method Uncal

| Peak No. | Reten. time | Area [mV.s] | Height [mV] | W05 [min.] | Area [%] | Height [%] |
|----------|-------------|-------------|-------------|------------|----------|------------|
| 1        | 6,547       | 18,9493     | 2,611       | 0,133      | 0,089    | 0,311      |
| 2        | 6,913       | 489,6194    | 56,927      | 0,140      | 2,298    | 6,777      |
| 3        | 7,993       | 63,4406     | 3,202       | 0,280      | 0,298    | 0,381      |
| 4        | 10,353      | 565,0182    | 52,658      | 0,133      | 2,652    | 6,269      |
| 5        | 14,880      | 61,0898     | 2,990       | 0,393      | 0,287    | 0,356      |
| 6        | 15,493      | 129,6335    | 4,091       | 0,520      | 0,608    | 0,487      |
| 7        | 16,407      | 162,7800    | 5,070       | 0,480      | 0,764    | 0,604      |
| 8        | 18,053      | 390,7752    | 11,453      | 0,507      | 1,834    | 1,363      |
| 9        | 18,587      | 413,8484    | 13,644      | 0,567      | 1,943    | 1,624      |
| 10       | 20,393      | 888,1915    | 32,840      | 0,407      | 4,169    | 3,909      |
| 11       | 21,180      | 1670,4171   | 48,095      | 0,547      | 7,841    | 5,725      |
| 12       | 22,853      | 2685,2707   | 51,754      | 0,667      | 12,604   | 6,161      |
| 13       | 24,533      | 3913,0106   | 142,092     | 0,407      | 18,367   | 16,915     |
| 14       | 25,527      | 484,0372    | 16,069      | 0,520      | 2,272    | 1,913      |
| 15       | 26,113      | 1155,2379   | 43,665      | 0,433      | 5,423    | 5,198      |
| 16       | 26,953      | 7908,3550   | 341,597     | 0,380      | 37,121   | 40,665     |
| 17       | 27,560      | 304,3928    | 11,269      | 0,473      | 1,430    | 1,342      |
| -        | Total       | 21304,0670  | 840,027     |            |          |            |

**Figure S15(c7):** RP-Hplc analysis of alkaline Hydrolysis products of **5'-r(CACGAAC)-3' (7b)** [after digestion for **27h** at pH 12.5 using 0.03N NaOH/ 20°C, followed by quenching with 0.03 N aq. acetic acid]. For Hplc conditions see the experimental section in the text.



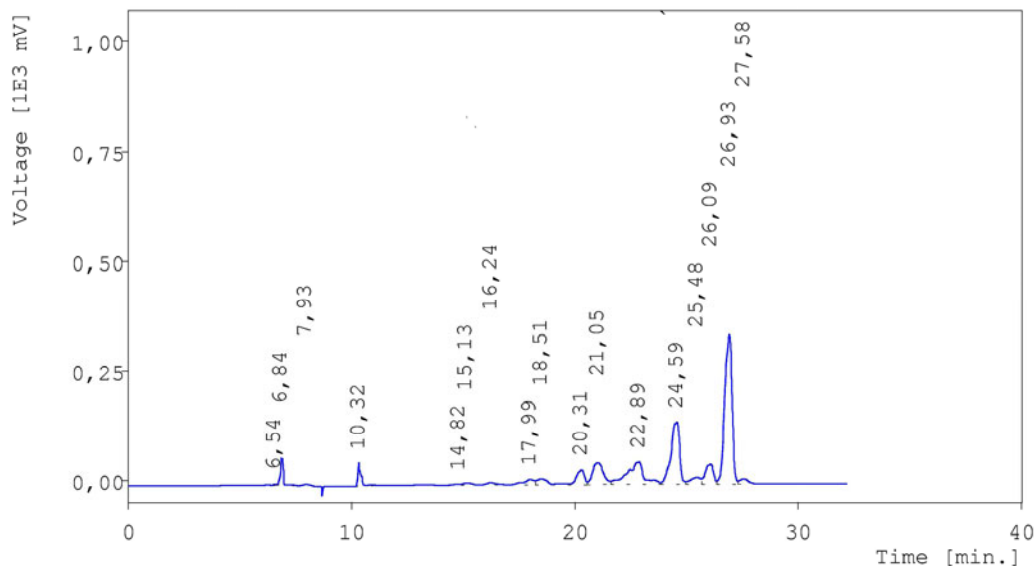

Result Table - Calculation Method Uncal

| Peak No. | Reten. time | Area [mV.s] | Height [mV] | W05 [min.] | Area [%] | Height [%] |
|----------|-------------|-------------|-------------|------------|----------|------------|
| 1        | 6,540       | 17,5694     | 2,462       | 0,127      | 0,082    | 0,291      |
| 2        | 6,840       | 582,8474    | 61,273      | 0,140      | 2,724    | 7,240      |
| 3        | 7,933       | 98,7680     | 4,218       | 0,340      | 0,462    | 0,498      |
| 4        | 10,320      | 547,7703    | 51,891      | 0,140      | 2,560    | 6,131      |
| 5        | 14,820      | 45,2478     | 2,437       | 0,320      | 0,211    | 0,288      |
| 6        | 15,127      | 120,1298    | 4,322       | 0,493      | 0,561    | 0,511      |
| 7        | 16,240      | 163,9731    | 5,161       | 0,453      | 0,766    | 0,610      |
| 8        | 17,993      | 410,1574    | 12,237      | 0,460      | 1,917    | 1,446      |
| 9        | 18,513      | 415,3318    | 13,617      | 0,567      | 1,941    | 1,609      |
| 10       | 20,307      | 891,7843    | 33,444      | 0,400      | 4,168    | 3,952      |
| 11       | 21,047      | 1655,0612   | 48,657      | 0,533      | 7,735    | 5,749      |
| 12       | 22,887      | 2679,1131   | 50,100      | 0,693      | 12,522   | 5,919      |
| 13       | 24,593      | 3905,2482   | 143,518     | 0,400      | 18,252   | 16,957     |
| 14       | 25,480      | 493,5675    | 15,890      | 0,533      | 2,307    | 1,877      |
| 15       | 26,093      | 1150,9578   | 44,474      | 0,427      | 5,379    | 5,255      |
| 16       | 26,933      | 7881,2894   | 341,135     | 0,387      | 36,836   | 40,306     |
| 17       | 27,580      | 336,8728    | 11,523      | 0,487      | 1,577    | 1,361      |
| -        | Total       | 21395,6894  | 846,357     |            |          |            |

**Figure S15(c8):** RP-Hplc analysis of alkaline Hydrolysis products of 5'-r(CACGAAC)-3' (7b) [after digestion for 48h at pH 12.5 using 0.03N NaOH/ 20°C, followed by quenching with 0.03 N aq. acetic acid]. For Hplc conditions see the experimental section in the text.
