# Supplementary material for: Non-identical electronic characters of the internucleotidic phosphates in RNA modulate the chemical reactivity of the phosphodiester bonds
Source: Royal Society of Chemistry journal article supplement (doi:10.1039/b516733g), 2006-01-01
Supplement: b516733g_11.pdf [file b516733g_11.pdf]

## Electronic Supplementary Information 11

### Non-identical Electronic Characters of the Internucleotidic Phosphates in RNA Modulate the Chemical Reactivity of the Phosphodiester Bonds

Jharna Barman<sup>1</sup>, Sandipta Acharya<sup>1</sup>, Chuanzheng Zhou<sup>1</sup>, Subhrangsu Chatterjee<sup>1</sup>, Åke Engström<sup>2</sup>, and Jyoti Chattopadhyaya<sup>1\*</sup>

<sup>1</sup>Department of Bioorganic Chemistry, Box 581, Biomedical Center, Uppsala University, S-751 23 Uppsala, Sweden

<sup>2</sup>Department of Medical Biochemistry and Microbiology, Box 582, Biomedical Center, Uppsala University, S-751 23 Uppsala, Sweden

[jyoti@boc.uu.se](mailto:jyoti@boc.uu.se)

#### Table of Content:

**Figure S15G.** Panels (g1) – (g7) show the RP-Hplc and SMART™ RP-Hplc profiles at ½, 2, 3, 4, 8, 15, 27 of alkali digestion of N<sup>1-Me</sup>-G containing heptamer . 5'-r(CACG<sup>Me</sup>CAC)-3' (8c). **p. S2–S8**

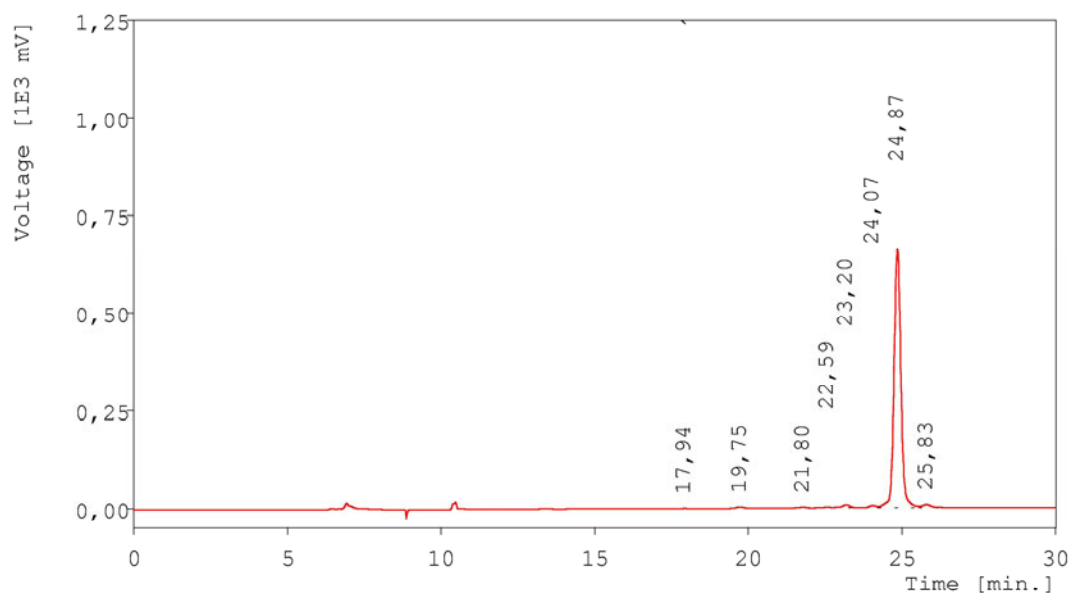

Result Table - Calculation Method Uncal

| Peak No. | Reten. time | Area [mV.s] | Height [mV] | W05 [min.] | Area [%] | Height [%] |
|----------|-------------|-------------|-------------|------------|----------|------------|
| 1        | 17,940      | 10,8943     | 0,755       | 0,247      | 0,100    | 0,109      |
| 2        | 19,747      | 57,8582     | 3,325       | 0,280      | 0,531    | 0,478      |
| 3        | 21,800      | 28,2681     | 1,877       | 0,247      | 0,259    | 0,270      |
| 4        | 22,587      | 27,6189     | 2,035       | 0,240      | 0,253    | 0,293      |
| 5        | 23,200      | 153,0104    | 7,824       | 0,267      | 1,404    | 1,126      |
| 6        | 24,067      | 97,2505     | 6,063       | 0,300      | 0,892    | 0,872      |
| 7        | 24,873      | 10309,4056  | 664,582     | 0,240      | 94,578   | 95,607     |
| 8        | 25,827      | 216,1206    | 8,658       | 0,347      | 1,983    | 1,245      |
| -        | Total       | 10900,4265  | 695,118     |            |          |            |

**Figure S15(g1):** RP-Hplc analysis of alkaline Hydrolysis products of **5'-r(CACG<sup>Me</sup>CAC)-3' (8c)** [after digestion for **0.5h** at pH 12.5 using 0.03N NaOH/ 20°C, followed by quenching with 0.03 N aq. acetic acid]. For Hplc conditions see the experimental section in the text.

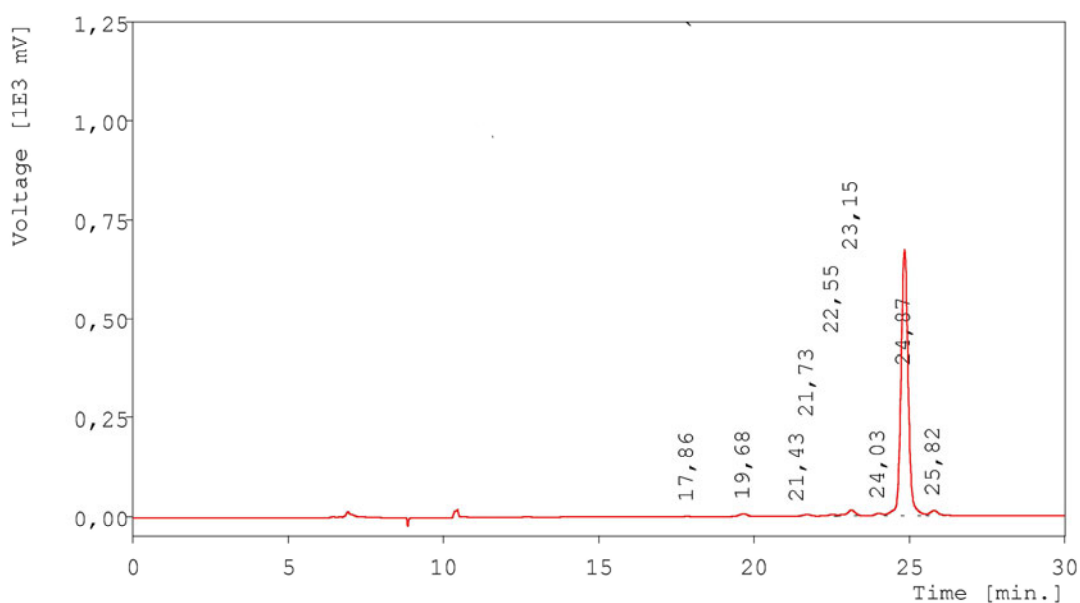

Result Table - Calculation Method Uncal

| Peak No. | Reten. time | Area [mV.s] | Height [mV] | W05 [min.] | Area [%] | Height [%] |
|----------|-------------|-------------|-------------|------------|----------|------------|
| 1        | 17,860      | 11,7804     | 0,731       | 0,260      | 0,100    | 0,101      |
| 2        | 19,680      | 113,2888    | 6,279       | 0,287      | 0,962    | 0,865      |
| 3        | 21,433      | 44,9898     | 0,333       | 0,520      | 0,382    | 0,046      |
| 4        | 21,727      | 62,3310     | 3,862       | 0,260      | 0,529    | 0,532      |
| 5        | 22,547      | 61,4830     | 4,169       | 0,273      | 0,522    | 0,575      |
| 6        | 23,153      | 288,4676    | 14,749      | 0,260      | 2,450    | 2,033      |
| 7        | 24,033      | 108,5148    | 6,449       | 0,320      | 0,922    | 0,889      |
| 8        | 24,867      | 10786,8465  | 675,370     | 0,247      | 91,622   | 93,084     |
| 9        | 25,820      | 295,5221    | 13,610      | 0,293      | 2,511    | 1,875      |
| -        | Total       | 11773,2240  | 725,551     |            |          |            |

**Figure S15(g2):** RP-Hplc analysis of alkaline Hydrolysis products of 5'-r(CACG<sup>Me</sup>CAC)-3' (**8c**) [after digestion for 2h at pH 12.5 using 0.03N NaOH/ 20°C, followed by quenching with 0.03 N aq. acetic acid]. For Hplc conditions see the experimental section in the text.

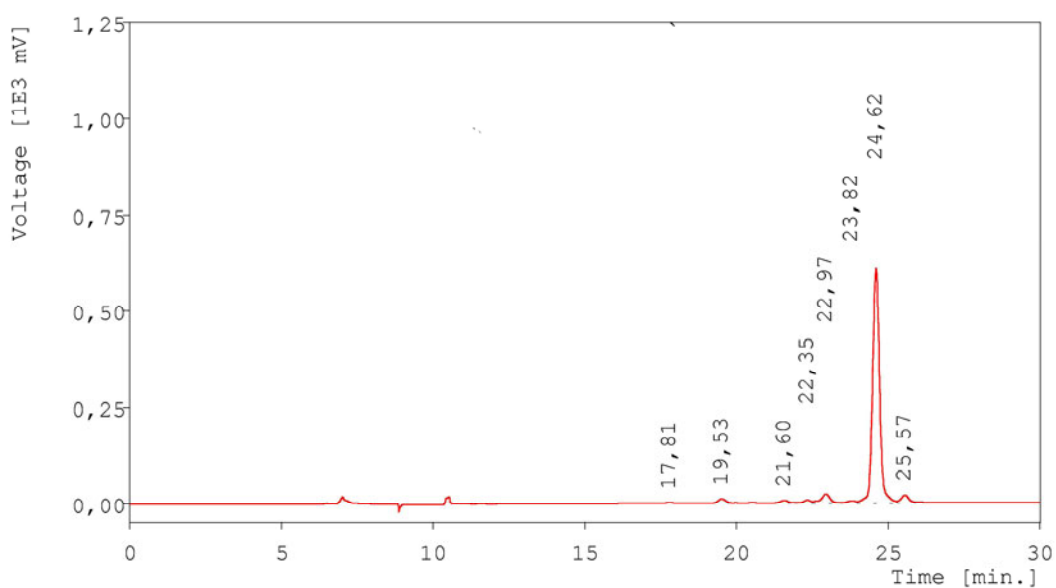

Result Table - Calculation Method Uncal

| Peak No. | Reten. time | Area [mV.s] | Height [mV] | W05 [min.] | Area [%] | Height [%] |
|----------|-------------|-------------|-------------|------------|----------|------------|
| 1        | 17,807      | 28,6086     | 1,922       | 0,247      | 0,254    | 0,279      |
| 2        | 19,533      | 183,1191    | 10,975      | 0,267      | 1,625    | 1,593      |
| 3        | 21,600      | 112,8508    | 6,959       | 0,260      | 1,001    | 1,010      |
| 4        | 22,353      | 111,4285    | 7,711       | 0,247      | 0,989    | 1,119      |
| 5        | 22,967      | 473,9428    | 23,981      | 0,280      | 4,205    | 3,480      |
| 6        | 23,820      | 99,1979     | 5,622       | 0,320      | 0,880    | 0,816      |
| 7        | 24,620      | 9841,0296   | 610,969     | 0,240      | 87,304   | 88,663     |
| 8        | 25,573      | 421,9468    | 20,954      | 0,273      | 3,742    | 3,040      |
| -        | Total       | 11272,1239  | 689,093     |            |          |            |

**Figure S15(g3):** RP-Hplc analysis of alkaline Hydrolysis products of **5'-r(CACG<sup>Me</sup>CAC)-3' (8c)** [after digestion for **3h** at pH 12.5 using 0.03N NaOH/ 20°C, followed by quenching with 0.03 N aq. acetic acid]. For Hplc conditions see the experimental section in the text.

]

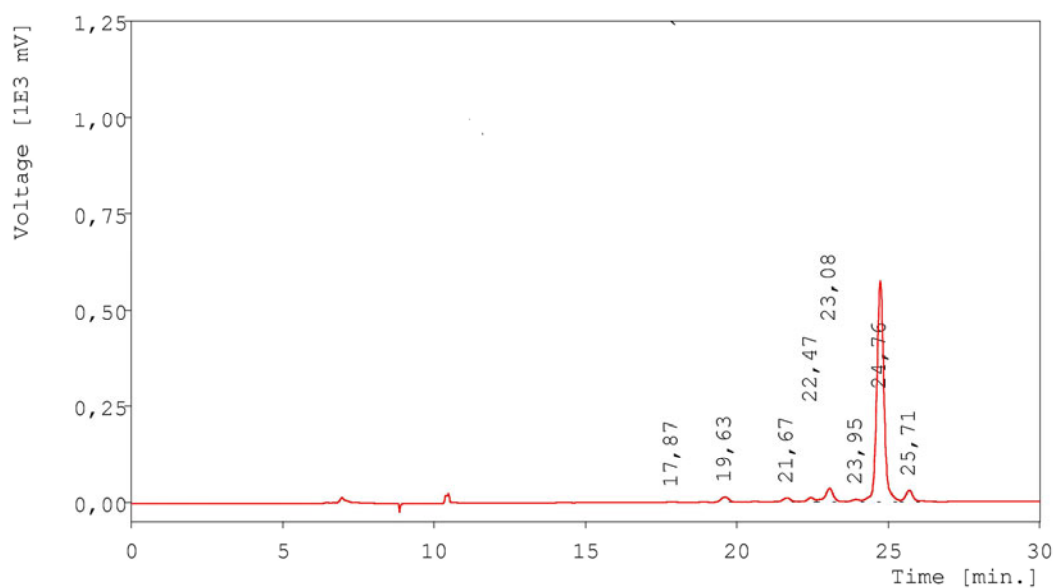

Result Table - Calculation Method Uncal

| Peak No. | Reten. time | Area [mV.s] | Height [mV] | W05 [min.] | Area [%] | Height [%] |
|----------|-------------|-------------|-------------|------------|----------|------------|
| 1        | 17,873      | 24,5523     | 1,470       | 0,273      | 0,214    | 0,216      |
| 2        | 19,627      | 255,6219    | 13,181      | 0,293      | 2,223    | 1,938      |
| 3        | 21,673      | 278,3389    | 10,872      | 0,287      | 2,421    | 1,598      |
| 4        | 22,467      | 190,9393    | 11,356      | 0,267      | 1,661    | 1,670      |
| 5        | 23,080      | 662,4926    | 33,490      | 0,273      | 5,762    | 4,924      |
| 6        | 23,953      | 116,2903    | 6,368       | 0,313      | 1,011    | 0,936      |
| 7        | 24,760      | 9446,0471   | 575,768     | 0,247      | 82,152   | 84,647     |
| 8        | 25,713      | 523,9513    | 27,693      | 0,267      | 4,556    | 4,071      |
| -        | Total       | 11498,2338  | 680,198     |            |          |            |

**Figure S15(g4):** RP-Hplc analysis of alkaline Hydrolysis products of 5'-r(CACG<sup>Me</sup>CAC)-3' (**8c**) [after digestion for 4h at pH 12.5 using 0.03N NaOH/ 20°C, followed by quenching with 0.03 N aq. acetic acid]. For Hplc conditions see the experimental section in the text.

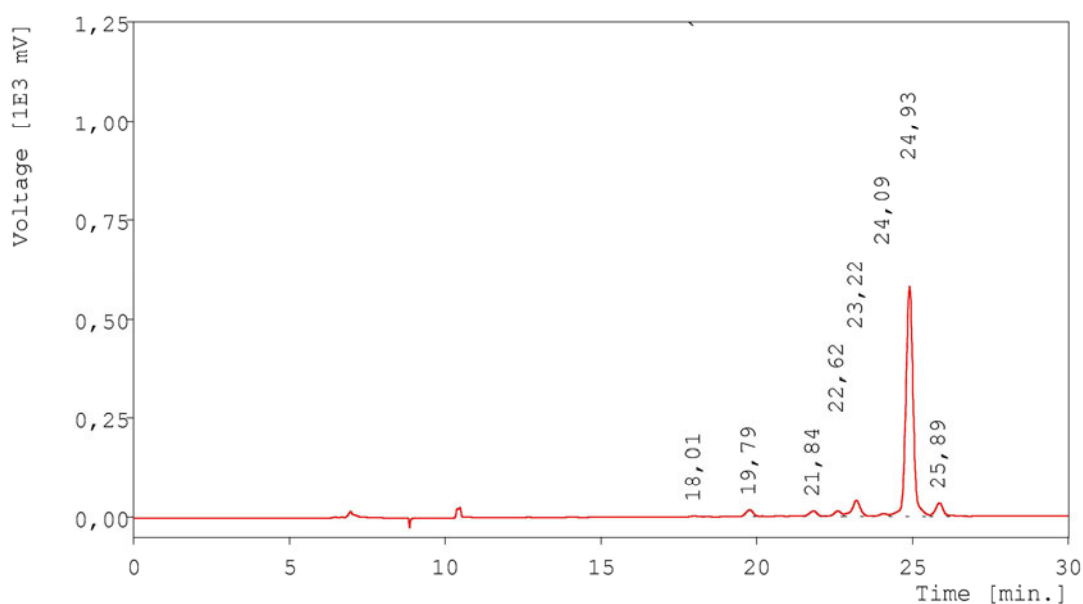

Result Table - Calculation Method Uncal

| Peak No. | Reten. time | Area [mV.s] | Height [mV] | W05 [min.] | Area [%] | Height [%] |
|----------|-------------|-------------|-------------|------------|----------|------------|
| 1        | 18,007      | 45,8503     | 2,473       | 0,253      | 0,387    | 0,347      |
| 2        | 19,793      | 306,7801    | 17,166      | 0,267      | 2,592    | 2,410      |
| 3        | 21,840      | 337,6832    | 14,069      | 0,280      | 2,853    | 1,975      |
| 4        | 22,620      | 236,8870    | 13,891      | 0,267      | 2,001    | 1,950      |
| 5        | 23,220      | 787,4155    | 40,803      | 0,267      | 6,653    | 5,728      |
| 6        | 24,093      | 122,6511    | 6,807       | 0,313      | 1,036    | 0,956      |
| 7        | 24,927      | 9386,8244   | 582,871     | 0,240      | 79,305   | 81,831     |
| 8        | 25,887      | 612,2792    | 34,204      | 0,260      | 5,173    | 4,803      |
| -        | Total       | 11836,3707  | 712,286     |            |          |            |

**Figure S15(g5):** RP-Hplc analysis of alkaline Hydrolysis products of 5'-r(CACG<sup>Me</sup>CAC)-3' (**8c**) [after digestion for **8h** at pH 12.5 using 0.03N NaOH/ 20°C, followed by quenching with 0.03 N aq. acetic acid]. For Hplc conditions see the experimental section in the text.

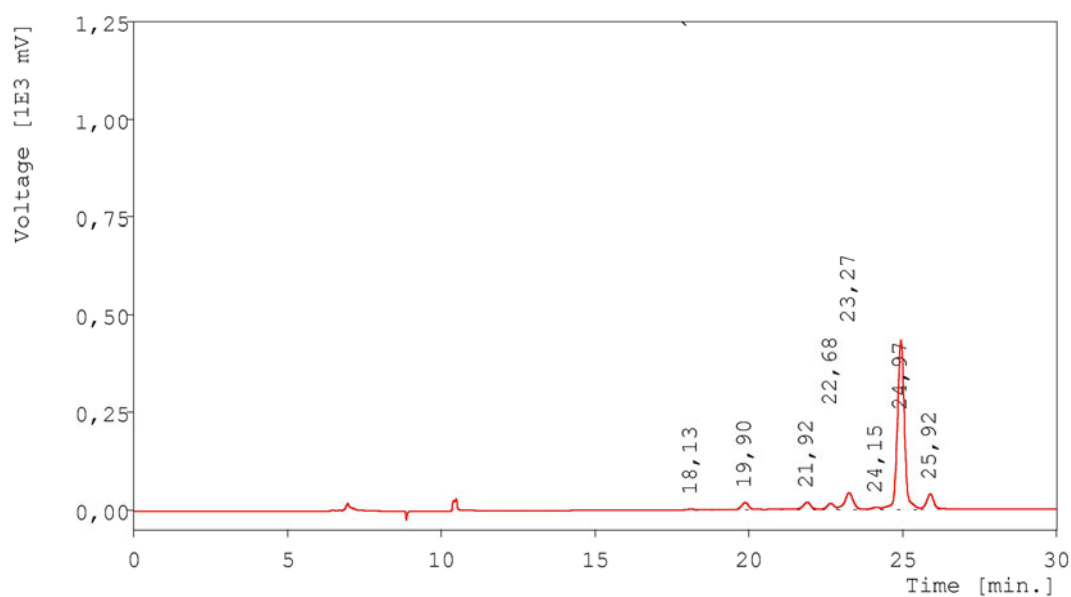

Result Table - Calculation Method Uncal

| Peak No. | Reten. time | Area [mV.s] | Height [mV] | W05 [min.] | Area [%] | Height [%] |
|----------|-------------|-------------|-------------|------------|----------|------------|
| 1        | 18,133      | 67,5459     | 2,363       | 0,413      | 0,700    | 0,409      |
| 2        | 19,900      | 372,6698    | 18,608      | 0,267      | 3,862    | 3,221      |
| 3        | 21,920      | 479,4366    | 18,988      | 0,267      | 4,969    | 3,287      |
| 4        | 22,680      | 260,2516    | 16,015      | 0,260      | 2,697    | 2,772      |
| 5        | 23,273      | 847,9306    | 43,107      | 0,280      | 8,788    | 7,462      |
| 6        | 24,153      | 99,4852     | 5,585       | 0,300      | 1,031    | 0,967      |
| 7        | 24,967      | 6856,9093   | 433,892     | 0,240      | 71,065   | 75,111     |
| 8        | 25,920      | 664,5381    | 39,113      | 0,253      | 6,888    | 6,771      |
| -        | Total       | 9648,7671   | 577,671     |            |          |            |

**Figure S15(g6):** RP-Hplc analysis of alkaline Hydrolysis products of 5'-r(CACG<sup>Me</sup>CAC)-3' (**8c**) [after digestion for 15h at pH 12.5 using 0.03N NaOH/ 20°C, followed by quenching with 0.03 N aq. acetic acid]. For Hplc conditions see the experimental section in the text.

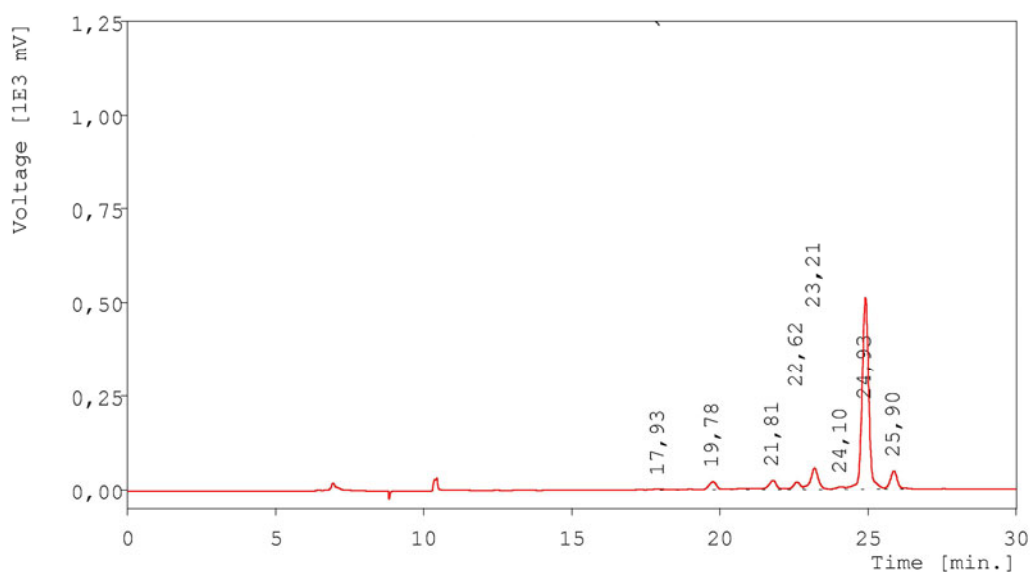

Result Table - Calculation Method Uncal

| Peak No. | Reten. time | Area [mV.s] | Height [mV] | W05 [min.] | Area [%] | Height [%] |
|----------|-------------|-------------|-------------|------------|----------|------------|
| 1        | 17,933      | 125,6006    | 3,076       | 0,367      | 1,077    | 0,442      |
| 2        | 19,780      | 452,0388    | 21,309      | 0,287      | 3,875    | 3,060      |
| 3        | 21,807      | 658,9611    | 24,844      | 0,273      | 5,649    | 3,567      |
| 4        | 22,620      | 331,5840    | 20,401      | 0,253      | 2,842    | 2,930      |
| 5        | 23,213      | 1067,7087   | 57,438      | 0,267      | 9,153    | 8,248      |
| 6        | 24,100      | 135,3010    | 6,982       | 0,313      | 1,160    | 1,003      |
| 7        | 24,933      | 7992,5623   | 513,131     | 0,233      | 68,516   | 73,683     |
| 8        | 25,900      | 901,5622    | 49,218      | 0,253      | 7,728    | 7,067      |
| -        | Total       | 11665,3186  | 696,399     |            |          |            |

**Figure S15(g7):** RP-Hplc analysis of alkaline Hydrolysis products of **5'-r(CACG<sup>Me</sup>CAC)-3' (8c)** [after digestion for **27h** at pH 12.5 using 0.03N NaOH/ 20°C, followed by quenching with 0.03 N aq. acetic acid]. For Hplc conditions see the experimental section in the text.
